1     **Long-term population studies uncover the genome structure and genetic basis of xenobiotic and**  
2             **host plant adaptation in the herbivore *Tetranychus urticae***

3  
4             Nicky Wybouw<sup>\*,1</sup>, Olivia Kosterlitz<sup>†,1,2</sup>, Andre H. Kurlovs<sup>†</sup>, Sabina Bajda<sup>\*</sup>, Robert Greenhalgh<sup>†</sup>,  
5             Simon Snoeck<sup>\*</sup>, Huyen Bui<sup>†</sup>, Astrid Bryon<sup>\*</sup>, Wannes Dermauw<sup>\*</sup>,  
6             Thomas Van Leeuwen<sup>\*,3</sup> and Richard M. Clark<sup>†,‡,3</sup>

7  
8  
9     <sup>\*</sup> Laboratory of Agrozoology, Department of Plants and Crops, Faculty of Bioscience Engineering, Ghent  
10    University, Coupure Links 653, B-9000 Ghent, Belgium.

11  
12    <sup>†</sup> School of Biological Sciences, University of Utah, 257 South 1400 East, Salt Lake City, Utah 84112,  
13    USA.

14  
15    <sup>‡</sup> Center for Cell and Genome Science, University of Utah, 257 South 1400 East, Salt Lake City, Utah  
16    84112, USA.

17  
18    <sup>1</sup> These authors contributed equally to this work.

19  
20    <sup>2</sup> Present address: Department of Biology, University of Washington, 24 Kincaid Hall, Seattle, WA,  
21    98195, USA.

22  
23    <sup>3</sup> Corresponding authors.

27 Running title: Genetic basis of mite adaptation

28

29 Keywords: Bulked segregant analysis, BSA, Spirodiclofen, Tomato, Acetyl-CoA Carboxylase

30

31 Corresponding authors:

32

33 Richard M. Clark

34 School of Biological Sciences

35 University of Utah

36 257 South 1400 East, Rm 201

37 Salt Lake City, Utah, USA 84112

38 Phone: 801-585-9722

39 Email: [richard.m.clark@utah.edu](mailto:richard.m.clark@utah.edu)

40

41

42 Thomas Van Leeuwen

43 Laboratory of Agrozoology

44 Department of Plants and Crops

45 Faculty of Bioscience Engineering

46 Ghent University

47 Coupure Links 653, B-9000 Ghent, Belgium

48 Phone: +3292646143

49 Email: [thomas.vanleeuwen@ugent.be](mailto:thomas.vanleeuwen@ugent.be)

50  
51  
52  
53  
54  
55  
56  
57  
58  
59  
60  
61  
62  
63  
64  
65  
66  
67  
68  
69  
70

## ABSTRACT

Pesticide resistance arises rapidly in arthropod herbivores, as can host plant adaptation, and both are significant problems in agriculture. These traits have been challenging to study as both are often polygenic and many arthropods are genetically intractable. Here, we examined the genetic architecture of pesticide resistance and host plant adaptation in the two-spotted spider mite, *Tetranychus urticae*, a global agricultural pest. We show that the short generation time and high fecundity of *T. urticae* can be readily exploited in experimental evolution designs for high-resolution mapping of quantitative traits. As revealed by selection with spirodiclofen, an acetyl-CoA decarboxylase inhibitor, in populations from a cross between a spirodiclofen resistant and a susceptible strain, and which also differed in performance on tomato, we found that a limited number of loci could explain quantitative resistance to this compound. These were resolved to narrow genomic intervals, suggesting specific candidate genes, including *acetyl-CoA decarboxylase* itself, clustered and copy variable cytochrome P450 genes, and *NADPH cytochrome P450 reductase*, which encodes a redox partner for cytochrome P450s. For performance on tomato, candidate genomic regions for response to selection were distinct from those responding to the synthetic compound and were consistent with a more polygenic architecture. In accomplishing this work, we exploited the continuous nature of allele frequency changes across experimental populations to resolve the existing fragmented *T. urticae* draft genome to pseudochromosomes. This improved assembly was indispensable for our analyses, as it will be for future research with this model herbivore that is exceptionally amenable to genetic studies.

## 71 INTRODUCTION

72 Although pesticides with diverse modes of action have been developed to combat populations of  
73 insect and mite herbivores, the evolution of resistance is common. As early as 1937, Theodosius  
74 Dobzhansky noted that the emergence of resistance to chemical pesticides in insect populations was  
75 “probably the best proof of the effectiveness of natural selection yet obtained” (Dobzhansky 1937;  
76 Ceccatti 2009). In the intervening years, numerous studies have implicated genetic variants in the  
77 molecular targets of pesticides as underlying “target-site” resistance. A second major route to resistance  
78 involves genetic changes that affect penetration, metabolism, sequestration and excretion of pesticides  
79 (toxicokinetic resistance) (Feyereisen *et al.* 2015). Of these, metabolic mechanisms have been especially  
80 well studied, and genetic changes affecting the coding sequences and transcription of genes in  
81 detoxification families, like cytochrome P450 monooxygenases (CYPs) and carboxyl/cholinesterases  
82 (CCEs), have been implicated in the metabolism of xenobiotics in diverse organisms (Li *et al.* 2007;  
83 Feyereisen *et al.* 2015; Van Leeuwen and Dermauw 2016).

84 Despite the ubiquity of pesticide resistance across arthropod species (Sparks and Nauen 2015), as  
85 well as progress in understanding the molecular mechanisms of toxicokinetic processes, questions about  
86 the genetic architecture and evolutionary origins of pesticide resistance remain (Hawkins *et al.* 2018).  
87 Numerous studies have shown that the genetic architecture of resistance in herbivores can be variable  
88 (ffrench-Constant *et al.* 2004; Van Leeuwen *et al.* 2010; Feyereisen *et al.* 2015). In some cases, a  
89 monogenic change, typically in a target-site, leads to high resistance levels observed in field populations  
90 (Roush and McKenzie 1987; Van Leeuwen *et al.* 2008, 2012; Douris *et al.* 2016; Riga *et al.* 2017).  
91 Nevertheless, high-level resistance to pesticides in herbivore populations is often polygenic, and in most  
92 cases the number of causal loci, their relative effect sizes, the nature of the underlying loci and alleles,  
93 and their origins, are unknown (Li *et al.* 2007; Hawkins *et al.* 2018). More generally, detailed  
94 understandings of the genetic architecture of resistance in arthropods come disproportionately from insects  
95 like *Drosophila melanogaster* or mosquito species, for which discovery of resistance loci has been  
96 facilitated by dense genetic and genomic resources (ffrench-Constant *et al.* 2004; Hemingway *et al.* 2004;  
97 Ranson *et al.* 2004). In contrast, for most herbivores, even major global pests, these resources are minimal  
98 or absent. In addition, the life histories or breeding systems of many herbivores hamper genetic  
99 approaches. Although large-effect quantitative trait loci (QTL) for resistance have been mapped in some  
100 arthropod herbivores, they frequently encompass large chromosomal regions (Gahan 2001; Saavedra-  
101 Rodriguez *et al.* 2008; Coates and Siegfried 2015; Coates *et al.* 2016).

102 Therefore, inferences about mechanisms of pesticide resistance in herbivore populations have  
103 often come from other approaches. For instance, expression studies have frequently been employed to  
104 identify genes induced or constitutively overexpressed in pesticide resistant strains (Oppenheim *et al.*

105 2015). Where resulting candidate genes are amenable to functional assays, as for CYPs and CCEs,  
106 enzymatic modification of pesticides *in vitro* has often been taken to suggest causality. Nonetheless,  
107 whether such candidates contribute to resistance *in vivo*, and their relative contribution in the case of  
108 polygenic resistance, is generally not known. Further, expression studies typically identify hundreds of  
109 candidate genes, many of which have unknown functions (Grbić *et al.* 2011; Dermauw *et al.* 2013; Bansal  
110 *et al.* 2014), or alternatively belong to gene families for which heterologous assays are either challenging  
111 or not established. The skewed focus on genes in a small number of experimentally tractable  
112 detoxification families has therefore potentially led to a biased view of the spectra of loci that contribute  
113 to pesticide resistance.

114         Mirroring long-standing interest in the evolution of pesticide resistance in herbivores, the genetic  
115 basis of the evolution of host plant use has attracted intense interest, as has the question of whether the  
116 latter may facilitate the former (Dermauw *et al.* 2018; Hardy *et al.* 2018). Typically, an herbivore  
117 encounters a set of defensive compounds in its diet. This is especially true for generalist herbivores,  
118 which encounter different blends of toxins across their host plant ranges (Strong *et al.* 1984;  
119 Schoonhoven *et al.* 2005). As observed for pesticide resistance, traditional genetic mapping studies using  
120 microsatellites and other genetic markers have revealed that the genetic architecture of host plant use is  
121 variable, and ranges from oligogenic to polygenic (Jones 1998; Midamegbe *et al.* 2011; Henniges-Janssen  
122 *et al.* 2011; Jaquiéry *et al.* 2012; Oppenheim *et al.* 2012; Alexandre *et al.* 2013; Nouhaud *et al.* 2014).  
123 However, with few exceptions (Bass *et al.* 2013; Wybouw *et al.* 2014), candidate genes for host plant  
124 adaptation are unknown, as is whether loci for host plant use are also targets of selection for resistance to  
125 synthetic pesticides.

126         In the current study, we examined the genetic basis of pesticide resistance and plant host use in  
127 the two-spotted spider mite, *Tetranychus urticae* (Arthropoda: Chelicerata: Acari: Acariformes). This  
128 herbivore is a globally distributed agricultural pest, and has among the highest documented occurrences  
129 of pesticide resistance (Van Leeuwen *et al.* 2010). *T. urticae* is also an extreme generalist (Migeon *et al.*  
130 2010), and numerous experimental studies have shown that populations can adapt quickly to new host  
131 plants (Gould 1979; Fry 1989; Agrawal 2000; Magalhães *et al.* 2007, 2009; Wybouw *et al.* 2015). Among  
132 herbivores, this species is exceptionally tractable for genetic and genomic studies. *T. urticae* has a fast  
133 generation time – less than ten days at high temperatures – and can be maintained in laboratory  
134 populations of thousands on single plants (Grbić *et al.* 2007; Van Leeuwen and Dermauw 2016). Prior  
135 cytological work has suggested that the species has three holocentric chromosomes (Helle and Bolland  
136 1967; Grbić *et al.* 2007), and the genome is compact, with a draft Sanger assembly having a cumulative  
137 length of only 90.8 Mb (Grbić *et al.* 2011). Further, annotation and gene expression studies revealed  
138 expansions of detoxification gene families, as well as gene families that change in expression upon

139 pesticide exposure or host plant shift, but that had not been previously associated with adaptation to either  
140 (Grbić *et al.* 2011; Dermauw *et al.* 2013; Wybouw *et al.* 2015; Snoeck *et al.* 2018).

141 To start, we generated an inbred strain, SR-VP, from a field collected *T. urticae* population  
142 resistant to spiroadiclofen, a recent but widely used compound that disrupts lipid synthesis by inhibiting  
143 acetyl-CoA decarboxylase (ACCase) (Bretschneider *et al.* 2007; Lümme *et al.* 2014). Prior genetic  
144 studies with the parental population were consistent with polygenic resistance, and a combination of  
145 approaches, including gene expression studies and *in vitro* tests for spiroadiclofen metabolism by several  
146 candidate CYPs, suggested a role for metabolic resistance (Van Pottelberge *et al.* 2009; Demaeght *et al.*  
147 2013). We found that the SR-VP strain retained high-level resistance to spiroadiclofen; additionally, it  
148 performed an order of magnitude better on tomato (*Solanum lycopersicum*), a challenging host for many  
149 spider mite populations (Agrawal *et al.* 2002; Wybouw *et al.* 2015), than did a spiroadiclofen-susceptible  
150 inbred strain, Lon-Inb.

151 With large, replicated populations from a SR-VP × Lon-Inb cross that were maintained with or  
152 without selection for ~50 generations, we identified genomic regions responding to both spiroadiclofen  
153 treatment and growth on tomato. This allowed us to address questions about the number of loci that  
154 underpin pesticide resistance, the genetic architecture of host plant adaptation, and the relationship  
155 between them. In some cases, we localized QTL to narrow genomic intervals that highlighted specific  
156 candidate genes and alleles. To accomplish this work, we exploited the continuous nature of allele  
157 frequency changes in experimental populations to consolidate the fragmented *T. urticae* draft genome into  
158 a chromosome-level assembly. This resource enabled our characterization of genome-wide responses to  
159 selection, as it will for future studies with this experimentally tractable herbivore.

160

## 161 **MATERIALS AND METHODS**

162

### 163 **Biological materials**

164 Genetic crosses and phenotypic selections were performed with two inbred *T. urticae* strains,  
165 Lon-Inb and SR-VP. Strain London, which was used to construct the reference Sanger draft assembly for  
166 *T. urticae* (hereafter the Sanger assembly) (Grbić *et al.* 2011), was not initially inbred (Van Leeuwen *et al.*  
167 *et al.* 2012). Subsequently, it was inbred by seven rounds of mother-son crosses to produce Lon-Inb (Díaz-  
168 Riquelme *et al.* 2016). Starting with a previously reported spiroadiclofen-resistant population, SR-VP (Van  
169 Pottelberge *et al.* 2009; Demaeght *et al.* 2013), we performed six generations of mother-son crosses to  
170 create the SR-VP inbred strain (hereafter simply SR-VP; inbreeding was performed as described by  
171 Bryon *et al.* 2017a). To facilitate genomic analyses, six additional *T. urticae* strains were collected as part

172 of this study (Heber, Parrott, RS, ShCo, TT, and WG-Del; generations of inbreeding is given in Table  
173 S1).

174

### 175 **Experimental design for host plant and pesticide selections**

176 The Lon-Inb and SR-VP strains were kept on potted bean plants (*Phaseolus vulgaris*) under  
177 laboratory conditions (25°C, 60% relative humidity and 16:8 hour light:dark photoperiod). An F1 hybrid  
178 population was generated by crossing 1500 one-day-old virgin adult Lon-Inb females with 600 one- to  
179 two-day-old adult SR-VP males. We allowed the hybrid population to expand for approximately five  
180 generations, and from this established 15 populations on potted bean plants (unselected controls) and 15  
181 populations on tomato plants (tomato selections; *S. lycopersicum* cv Moneymaker). These populations  
182 were founded with 500 adult females. Subsequently, from each of the 15 control populations on bean, a  
183 paired spiroadiclofen selection population was established by transferring approximately 1000 mites to  
184 bean plants that were sprayed with 100 mg/L spiroadiclofen (commercial formulation, Envidor® 240 g/L  
185 SC, Bayer Crop Science, Leverkusen, Germany). Mites from these 45 populations were propagated for  
186 over 50 generations. New three-week-old tomato and bean plants (spiroadiclofen-sprayed and non-  
187 sprayed) were offered to the respective selection and control populations on a weekly basis. During the  
188 course of the experiment, the selection pressure of spiroadiclofen was gradually increased until no  
189 acaricide related mortality was observed on beans sprayed until run-off with 5000 mg/L of spiroadiclofen.

190

### 191 **Phenotypic analyses of evolved populations**

192 Mites from the ancestral strains and derived populations across the three treatments (tomato  
193 selection, spiroadiclofen selection and control) were reared on unsprayed bean plants for two generations  
194 to remove acclimation or maternal effects. Experimental evolution to spiroadiclofen was evaluated by  
195 performing larvicidal toxicity bioassays as previously described (Van Pottelberge *et al.* 2009). Briefly,  
196 leaf discs were sprayed in an Auto Loading Potter Lab spray tower (Burkard Scientific, Uxbridge, UK)  
197 with settings of 1 bar and 850 µl with a 0.002 g/cm<sup>2</sup> coverage. Survival was scored at the deutonymphal  
198 stage. The spiroadiclofen concentrations lethal to half the population (LC<sub>50</sub> values) of the parental strains  
199 were estimated using probit analysis (POLO; LeOra Software, Berkeley, CA). For the parental SR-VP  
200 and Lon-Inb strains, differences in survival percentages at 2500 mg/L and 5000 mg/L spiroadiclofen were  
201 assessed using a generalized linear model with a binomial distribution (proc genmod in SAS, version 9.4,  
202 SAS Institute, Cary, NC) with strain and dosage as fixed effects. Survival percentages between the paired  
203 spiroadiclofen-selected and control populations were analyzed using a generalized linear mixed model with  
204 a binomial distribution (proc glimmix in SAS). Here, selection regime and dosage were incorporated as  
205 fixed effects in the linear model, whereas population was regarded as a random effect.

206 Experimental evolution on tomato was evaluated by transferring 35 two-day-old females to the  
207 three leaflets of a fully developed tomato leaf with four replicates per population. Performance was  
208 estimated ten days post-infestation by measuring total mite population sizes on the respective tomato  
209 plants (Wybouw *et al.* 2015). Performance of the two parental strains on tomato was analyzed using a  
210 general linear model (proc glm in SAS). Differences in mite performance on tomato between the tomato-  
211 selected and control populations were assessed by a general linear mixed model with the selection regime  
212 and populations as fixed and random effects, respectively (proc mixed in SAS).

213

## 214 **Genome sequencing**

215 For *T. urticae* strains, genomic DNA preparation and quality assessment, construction of Illumina  
216 libraries, and sequencing at either the Centro Nacional de Análisis Genómico (CNAG, Barcelona, Spain)  
217 or the High-Throughput Genomics and Bioinformatic Analysis Shared Resource at the Huntsman Cancer  
218 Institute (University of Utah, Salt Lake City, UT) was as previously described (Bryon *et al.* 2017a). For  
219 Lon-Inb and SR-VP paired-end reads of 101 bp were generated, and for all other strains except TT and  
220 RS, paired-end 125 bp reads were produced; for TT, single-end 50 bp reads were generated, while for RS,  
221 paired-end 300 bp reads were produced on an Illumina MiSeq instrument (Table S1).

222 To analyze the impact of spirodiclofen selection on genome-wide allele frequencies, we prepared  
223 DNA from eight spirodiclofen-selected populations that responded strongly to selection, along with their  
224 matching unselected control populations (Figure 1A). We also prepared DNA from five tomato-selected  
225 and bean control populations with respectively high and low performance on tomato (Figure 1B). For  
226 each of the resulting 22 experimental populations (some control populations were shared between  
227 selections, Figure 1A,B), genomic DNA was extracted from ~800 to 1000 pooled adult females collected  
228 at the end of the selection experiments using a phenol-chloroform method as previously described (Van  
229 Leeuwen *et al.* 2012) and washed twice with 70% ethanol. DNA samples were subsequently purified with  
230 an EZNA Cycle Pure Kit (Omega Bio-tek, VWR, Amsterdam, the Netherlands) and eluted in 35 µl of TE  
231 buffer provided by the purification kit. DNA concentrations and integrity were measured with a Qubit  
232 (Thermo Fisher Scientific, Waltham, MA) and an Agilent TapeStation 2200 (Software A.01.04; Agilent  
233 Technologies, Santa Clara, CA), respectively. For each population sample, paired-end reads of 125 bp in  
234 length were generated at the High-Throughput Genomics and Bioinformatic Analysis Shared Resource.

235

## 236 **Identification of high-quality variants**

237 Reads from *T. urticae* strains and experimental populations (Table S1) were aligned to the *T.*  
238 *urticae* Sanger assembly (Grbić *et al.* 2011) using the default settings of BWA-MEM 0.7.15-r1140 (Li  
239 2013), and were sorted by coordinate using SAMtools 1.3.1 (Li *et al.* 2009). Duplicate reads were



240 subsequently marked with Picard 2.6.0 (<http://broadinstitute.github.io/picard>) prior to indel realignment  
241 with GATK 3.6-0-g89b7209 (Van der Auwera *et al.* 2013). Across Lon-Inb, SR-VP, and the 22  
242 experimental populations, single nucleotide polymorphisms (SNPs) and indels were called using the  
243 GATK 3.6-0-g89b7209 UnifiedGenotyper tool; the output of this analysis was a single Variant Call  
244 Format (VCF) file from which allele frequencies at variable sites were extracted for downstream analyses.  
245 We also performed a similar analysis with short-read data from two prior bulked segregant analysis  
246 (BSA) genetic mapping studies in *T. urticae* (Van Leeuwen *et al.* 2012; Bryon *et al.* 2017a) using the  
247 same read mapping and variant prediction workflow. To select high-quality SNPs in the respective data  
248 sets (parental strains and derived populations), we parsed the VCF files to identify alternative alleles that  
249 were fixed but different in parental strains and had Phred-scaled quality scores >100. Additionally, on a  
250 per sample basis, we required that read coverage at a variable site be within 25-150% of the respective  
251 sample's genome-wide mean as assessed at all variable positions. For the Bryon *et al.* (2017a) data, the  
252 second parent could not be inferred directly as single males founded crosses (male *T. urticae* are haploid).  
253 For inference, we adopted the same methods used in that study (Bryon *et al.* 2017a).

254

### 255 **Principal component analysis**

256 For the control, spirodiclofen-selected, and tomato-selected populations, a principal component  
257 analysis (PCA) was performed using a correlation matrix of SNP frequencies as extracted from the  
258 respective VCF file (R function `prcomp`, which is part of the R-package 'stats', version 3.3.0) (R Core  
259 Team 2016). To be included in the PCA (Figure 2), variable positions had to pass the filters we used to  
260 select high-quality SNPs in each of the 22 experimental samples. The PCA plot was created with  
261 `autoplot`, a function of the R-package 'ggplot2' version 2.1.0 (Wickham 2016).

262

### 263 ***De novo* assemblies of seven *T. urticae* strains**

264 We generated *de novo* assemblies for inbred *T. urticae* strains (Table S1) and aligned them to the  
265 Sanger assembly. Illumina reads were imported into CLC Genomics Workbench 9.0.1  
266 (<https://www.qiagenbioinformatics.com/>) and trimmed using the following settings: quality score limit of  
267 0.05 and maximum of 2 ambiguous nucleotides. *De novo* assemblies for each strain were subsequently  
268 constructed with the short-read data using the following options: Automatic word and bubble size,  
269 Minimum contig length of 200, Auto detection of paired distances, Perform scaffolding, and Map reads  
270 back to contigs (Mismatch cost: 2, Insertion cost: 3, Deletion cost: 3, Length fraction: 0.5, Similarity  
271 fraction 0.8, and Update contigs checked). The resulting sequences for each strain were aligned to the  
272 Sanger assembly using the default settings of the BLASR 1.3.1 aligner (Chaisson and Tesler 2012). The

273 alignments were subsequently converted to coordinate-sorted and indexed BAM files using SAMtools  
274 1.3.1 (Li *et al.* 2009).

275

### 276 **Identification of misassembled regions in Sanger scaffolds**

277 To locate potential misassemblies in the Sanger reference sequence, we identified abrupt shifts in  
278 allele frequencies in experimental populations as a function of genomic position. To do this, we  
279 developed a metric, the average window distance (AWD), for which large values between adjacent (non-  
280 overlapping) genomic windows are expected to reflect Sanger assembly errors. A schematic illustrating  
281 the AWD metric, and the principle behind its use to detect misassembled regions, is given in Figure 3.  
282 Briefly, for our study we computed AWD values with 10 kb offsets for all informative, immediately  
283 adjacent non-overlapping 150 kb windows across concatenated Sanger scaffolds (ordered by decreasing  
284 length). For this analysis, we included scaffolds 1-44 as they harbor ~95% of the cumulative Sanger  
285 assembly length, and were included in three prior BSA mapping studies in *T. urticae* (Van Leeuwen *et al.*  
286 2012; Demaeght *et al.* 2014; Bryon *et al.* 2017a). The remaining 596 scaffolds decrease rapidly in length,  
287 with a median of only 4 kb, are often repetitive, and contain sequences potentially allelic to those found in  
288 the larger scaffolds (Grbić *et al.* 2011; Wybouw *et al.* 2018). For windows to be informative across all  
289 samples (experimental populations and the two parents), they had to have  $\geq 20$  high quality SNPs; if not,  
290 the nearest adjacent windows meeting these criteria were used. To compute AWD values from  
291 informative non-overlapping windows, we: (1) determined each window's SR-VP allele frequency (as  
292 assessed from all aligned reads at informative SNP loci in the windows) for each of the 22 study  
293 populations individually, (2) calculated the absolute values of the differences in the two frequency values  
294 between the non-overlapping windows on a per population basis, and (3) averaged the resulting 22 values  
295 (see Figure 3 for example calculations).

296 To investigate potential misassemblies suggested by high AWD values, we then examined peaks  
297 greater than two standard deviations from the genome-wide AWD mean (0.07). Potential sources of  
298 elevated “blips” in AWD values, other than true assembly errors, are small transpositions, or simply  
299 errant SNP predictions in complex, local regions. Therefore, we removed windows yielding AWD values  
300  $> 0.07$  (the masked regions spanned all pairs of windows that yielded above-threshold AWD values), and  
301 then recalculated AWD values across the genome. Excluding junctions between scaffolds, which are *de*  
302 *facto* misassemblies in the concatenated genome (Figure 1), regions of elevated AWD values that did not  
303 drop below 0.07 were investigated further (Figure S1). To do this, we examined alignments of short-read  
304 *de novo* assemblies from seven *T. urticae* strains (Table S1) to the Sanger reference sequence in the  
305 regions of elevated AWD values. BLASR 1.3.1, which was used to generate the alignments, allows  
306 contigs (or portions thereof) to be aligned to multiple genomic locations. If one set of aligned short-read

307 assembled contigs (or contig portions) ended, and another set started within the same 5 bp at the site of an  
308 anomalously high AWD value internal to a Sanger scaffold, we considered the location a misassembly.  
309 For these instances, scaffolds were broken into subscaffolds for subsequent analyses (four out of six  
310 instances, on scaffolds 1, 2, 4, and 8 as indicated in Table S2). For the remaining cases (Figure S1), short-  
311 read *de novo* assemblies either did not suggest misassemblies, or were uninformative (no *de novo* contigs  
312 aligned at the sites of the elevated AWD values).

313

#### 314 **Construction of superscaffolds with population allele frequency data**

315 To place and order Sanger scaffolds relative to one another, we chained Sanger scaffolds  
316 (including subscaffolds) together based on reciprocal lowest AWD values as calculated from terminal  
317 windows on the scaffolds. All Sanger scaffolds and subscaffolds of at least 100 kb in length were used in  
318 the process (Sanger scaffolds 1-44), except for scaffold 42, which was excluded because of extreme copy  
319 variation (Figure S2). AWD calculations were as for misassembly detection, except only terminal  
320 windows were used, hereafter called scaffold segment ends (SSEs). SSEs lengths were 300 kb, but were  
321 offset 50 kb internally to the ends of Sanger scaffolds; this offset was used to avoid potentially repetitive  
322 sequences at the ends of Sanger scaffolds (i.e., we deemed that variant detection at Sanger scaffold ends  
323 might be unreliable). If a Sanger scaffold was shorter than the window length plus the offsets (400 kb in  
324 total, corresponding to Sanger scaffolds 39 and higher), the entire Sanger scaffold was treated as a single  
325 SSE (i.e., one non-oriented window).

326 With the resulting 94 SSEs, AWDs were then calculated among all pairs. For each SSE, a list was  
327 produced with all non-self AWD comparisons containing the SSE (a total of 93 comparisons) and sorted  
328 in ascending order. The five smallest AWD comparisons were retained for downstream analyses; in this  
329 scheme, a small AWD value supports proximity in the genome (Figure 3). For two SSEs, reciprocal  
330 smallest AWD values were taken as evidence of adjacency and relative orientation. When this occurred,  
331 the two SSEs were removed from all SSE lists and excluded from subsequent analyses, and the process  
332 was repeated iteratively with unmatched SSEs until there were no more rankings to compare (in this  
333 process, reciprocal best hits of two SSEs on the same scaffold were ignored). An exception was for  
334 Sanger scaffolds 39 and greater; as only a single SSE could be calculated for these small scaffolds, they  
335 were only removed once they had been called twice (this allowed these Sanger scaffolds to potentially  
336 connect to other Sanger scaffolds on both sides). Sanger scaffold endings with unpaired SSEs, a result of  
337 no reciprocal AWD matches in the initial top five rankings in the terminal iteration, were considered as  
338 putative chromosome ends and were used to initiate the construction of superscaffolds by placing and  
339 ordering Sanger scaffolds according to the catalog of reciprocal best hits. An exception was for Sanger  
340 scaffolds less than 400 kb; because these were treated as single windows, their forward or reverse

341 orientations in resulting superscaffolds could not be determined, even though they could be placed  
342 between flanking Sanger scaffolds.

343

### 344 **Construction of pseudochromosomes by incorporating *de novo* assembly data**

345 As a complementary method for ordering and orienting scaffolds in the Sanger assembly, and to  
346 validate the AWD-based joining approach, we assessed if contigs from short-read *de novo* assemblies of  
347 seven *T. urticae* strains (Table S1) bridged Sanger scaffolds. With pysam 0.14.1 (Li *et al.* 2009) and the  
348 BLASR 1.3.1 alignments of *de novo* short-read assemblies to Sanger scaffolds, we identified short-read  
349 assembled contigs across the seven strains for which at least 7.5 kb aligned to 75 kb segments (or the last  
350 25% of the total scaffold length, whichever was smaller) at the ends of two different Sanger scaffolds.  
351 When this occurred, we joined the scaffolds into larger superscaffolds in an iterative manner (in a small  
352 number of cases, different contigs supported different joins; these were resolved based on best alignment  
353 support as described in the footnotes for Table S3). Finally, we resolved superscaffolds from the AWD-  
354 based joining and assembly-bridging approaches to produce three pseudochromosomes (pChr1-3). In  
355 constructing the final pseudochromosomes, we gave precedence to the assembly-bridging method as it  
356 made explicit predictions based on assembled sequences (Table S3, and see Results). Following  
357 pseudochromosome construction, gene coordinates from the Online Resource for Community Annotation  
358 of Eukaryotes (ORCAE) (Sterck *et al.* 2012) June 2016 *T. urticae* annotation were converted to  
359 pseudochromosome coordinates and checked, sorted and validated using GenomeTools 1.5.10 (Gremme  
360 *et al.* 2013).

361

### 362 **Bulked segregant analyses to detect responses to spirodiclofen**

363 Our experimental design for spirodiclofen studies, in which eight paired selected/control  
364 populations were used, suggested a straightforward permutation approach for detection of significant  
365 responses to selection. For each pair of samples, we adapted methods from previous BSA studies of  
366 monogenic traits in *T. urticae* (Van Leeuwen *et al.* 2012; Demaeght *et al.* 2014; Bryon *et al.* 2017a) and  
367 allele frequencies as assessed for AWD calculations (see section “Identification of misassembled regions  
368 in Sanger scaffolds”) to calculate the genome-wide change in SR-VP allele frequencies between all  
369 selected and control pairs (the analysis was performed using pChr1-3). In BSA mapping studies,  
370 deviations in allele frequencies from zero occur by genetic drift (where they are expected to be  
371 uncorrelated between selected/control pairs), or in response to selection (where they should be correlated  
372 in location and direction of change) (Bryon *et al.* 2017b). To establish regions of correlated responses, we  
373 first averaged BSA scans from all eight pairs over the genome (this created the observed distribution as  
374 assessed with all replicate information). Then, we permuted the scan data for the eight replicates  $10^4$

375 times; in each instance we calculated an analogous BSA average across the permuted eight replicates. To  
376 maintain linkage information for each permutation instance, we treated the concatenated genome (pChr1-  
377 3) as if it was circular and chose random start locations for each of the eight scans. From the  $10^4$   
378 permutations, we then constructed a distribution of the absolute values of the maximal deviations in the  
379 averaged BSAs from zero (one data point per permutation; absolute values were taken as responses to  
380 drift and selection can be in the direction of either parent). We assigned as QTL those peaks where the  
381 observed allele frequency maxima were greater than the 95th percentile of values from the permutations  
382 (a false discovery rate, FDR, of 5%).

383

#### 384 **BSA analyses to detect responses to tomato**

385 BSA analyses and permutation-based detection of QTL for selection on tomato was performed as  
386 for spirodiclofen selections with one modification. As the five tomato/control populations were not  
387 paired, we generated all possible five-to-five combinations of tomato-selected and control populations.  
388 For each grouping, BSA scans were performed, and  $10^4$  permutations were used to establish combination-  
389 specific values for detecting significant QTL (FDRs of 5%).

390

#### 391 **Detection of QTL with the G' method**

392 As a complementary approach for QTL detection, we used the G' method (Magwene *et al.* 2011)  
393 as implemented in QTLseqr 0.6.4. (Mansfeld and Grumet 2018). As input for QTLseqr, alignments from  
394 replicates from the respective spirodiclofen and tomato selections, and the respective control populations,  
395 were pooled for variant calling by GATK to form “high bulk” and “low bulk” groups, respectively; the  
396 resulting VCF file was converted into the table format using the GATK VariantsToTable tool. For quality  
397 control for variant selection, we followed the recommendations provided in the QTLseqr manual and  
398 vignette. We only included SNPs with a combined bulk read coverage of 400-500, a coverage of at least  
399 200 for each bulk, and genotype quality scores of 99; additionally, SNPs were excluded from the analysis  
400 if they had a reference strain allele frequency of below 0.05 or above 0.95 in both high and low bulks, and  
401 fell outside the DeltaSNP filter threshold of 0.15 (spirodiclofen selection) and 0.10 (tomato selection).  
402 The DeltaSNP filter thresholds were empirically determined from analyses of the fits of the filtered data  
403 to null log G' distributions as described in the QTLseqr vignette. Window sizes were set at 500 kb, and  
404 the genome-wide FDR for QTL intervals was set to 0.05.

405

#### 406 **Analysis of candidate genes for responses to selection**

407 Genetic differences between Lon-Inb and SR-VP in coding regions of candidate genes for  
408 response to spirodiclofen selection were annotated with SnpEff 4.2 (Cingolani *et al.* 2012). Predicted

409 variants and their annotated effects on candidate genes were visually curated in Integrative Genomics  
410 Viewer 2.3 (Robinson *et al.* 2011; Thorvaldsdóttir *et al.* 2013) with alignments of Illumina reads for Lon-  
411 Inb and SR-VP, as well as with alignments of short-read *de novo* assemblies for these two strains.

412 To assess if nonsynonymous changes were unique to SR-VP, we examined alignments of  
413 genomic Illumina reads available from the seven additional strains reported in this study (Table S1), five  
414 strains or populations reported by Bryon *et al.* 2017a, strain EtoxR (Van Leeuwen *et al.* 2012), strain  
415 HexR (Demaeght *et al.* 2014), and strain Montpellier (Grbić *et al.* 2011). We also tested for the presence  
416 of nonsynonymous variants unique to SR-VP in strain Harbin for which only RNA-seq data was available  
417 (Zhao *et al.* 2016). To do this, we generated alignments with the respective RNA-seq reads using the two-  
418 pass mode of STAR 2.5.2b (Dobin *et al.* 2013) with a maximum intron size of 20 kb. Visual assessment  
419 of one candidate region for response to spirodiclofen selection suggested extensive copy number  
420 variation. To quantify this, we assessed read coverage for both Lon-Inb and SR-VP throughout the region  
421 underlying the peak response and normalized it to the pseudochromosome-wide mean coverage as  
422 assessed from BAM files for Lon-Inb and SR-VP using pysam 0.9.1.4.

423

#### 424 **Data availability**

425 Sequence data has been deposited at the Sequence Read Archive (PRJNA498683). Supplemental  
426 figures and tables are available at FigShare. Other data, including variant loci and allele frequency  
427 information as a VCF file, BLASR-alignments of short-read assemblies to the Sanger reference assembly  
428 as BAM files, along with the respective input files for alignments, and the *T. urticae* pseudochromosome  
429 assembly, are available at the National Science Foundation supported CyVerse repository (public links for  
430 review are appended to this single document PDF submission; at acceptance, a permanent DOI for the  
431 data sets will be generated). Available strains will be distributed by the corresponding authors (permits  
432 may be required).

433

## 434 **RESULTS**

435

### 436 **Phenotypic responses to pesticide and host plant selections**

437 Our study used two inbred strains of *T. urticae*, SR-VP and Lon-Inb, which were derived from  
438 two previously characterized populations (Van Pottelberge *et al.* 2009; Grbić *et al.* 2011). As revealed by  
439 toxicity bioassays, the SR-VP strain maintained high-level resistance to spirodiclofen as found in its  
440 parental population (Van Pottelberge *et al.* 2009), while Lon-Inb was susceptible. The LC<sub>50</sub> for Lon-Inb  
441 was a low 2.8 mg/L (95% confidence interval, 2.4 to 3.2 mg/L), while the LC<sub>50</sub> value could not be  
442 calculated for SR-VP as resistance levels were too high (a reliable calculation would require

443 concentrations higher than 5000 mg/L). Survival varied significantly at doses of both 2500 and 5000  
444 mg/L spirodiclofen (each  $p$ -value  $< 0.0001$  as identified by a generalized linear model with a binomial  
445 distribution; Figure 1A). In addition, reproductive performance of SR-VP on tomato was ~10-fold higher  
446 than for Lon-Inb, a significant difference ( $p < 0.0001$  as identified by a general linear model, Figure 1B).

447 In experimental populations propagated for ~50 generations following a SR-VP  $\times$  Lon-Inb cross,  
448 survival at both 2500 and 5000 mg/L of spirodiclofen was significantly higher for spirodiclofen-selected  
449 populations compared to their paired control populations, and survival differed between the two doses  
450 (generalized linear mixed model with a binomial distribution,  $p$ -values  $< 0.0001$ ; Figure 1A). In response  
451 to growth on tomato, after ~50 generations tomato-selected mite populations had significantly higher  
452 performance on tomato as compared to the control populations maintained on bean (general linear mixed  
453 model,  $p$ -value = 0.0189 Figure 1B); however, in contrast to selection by spirodiclofen, the phenotypic  
454 difference was modest (compare Figure 1A to Figure 1B).

455

#### 456 **Genomic responses to selection**

457 To examine genomic responses to selection, we chose, based on large resistance ratios, eight pairs  
458 of spirodiclofen-selected and matching control populations for genomic analyses (Figure 1A).  
459 Additionally, we chose five tomato-selected populations with high performance on tomato (Figure 1B),  
460 and an additional control population that performed poorly on tomato (population C15; in total nine  
461 control populations were selected to inform responses to spirodiclofen, tomato plants, or both, Figure 1).  
462 To assess genomic responses to selection, we sequenced genomic DNA from these 22 populations, as  
463 well as the parental SR-VP and Lon-Inb strains.

464 At each of 694,308 high-quality SNP loci that distinguished SR-VP and Lon-Inb, we determined  
465 the frequency of the SR-VP allele in each of the 22 populations. A PCA with the resulting data revealed  
466 that all tomato-selected populations were distinct along principal component 1 (PC1) from control and  
467 spirodiclofen-selected populations; along PC2, spirodiclofen-selected populations clustered separately  
468 from control populations (Figure 2).

469 As controls and treatments were separated by a PCA, we examined allele frequencies of  
470 populations across the largest 44 scaffolds in the Sanger assembly, all of which are 185 kb or larger and  
471 collectively harbor ~95% of the assembly length (Grbić *et al.* 2011; Van Leeuwen *et al.* 2012). A sliding  
472 window analysis revealed that across all populations allele frequencies were broadly similar over much of  
473 the genome (Figure 4A). However, for several small regions, for example on Sanger scaffolds 5 and 16,  
474 fixation (or near fixation) of alleles from one parent was observed, potentially reflecting the purging of  
475 segregating deleterious variants (see Discussion).

476 Nevertheless, at some loci systematic deviations in allele frequencies were observed between  
477 control and selected populations, suggesting responses to selection. For example, in regions on Sanger  
478 scaffolds 17 and 21 all spirodiclofen-selected populations differed from control populations, and in  
479 regions on Sanger scaffolds 11 and 32, all tomato-selected populations differed from control populations  
480 (Figure 4A). However, some of these regions were present on small Sanger scaffolds, or were near the  
481 ends of larger ones. Therefore, comprehensive description of genomic responses to selection was not  
482 possible with the existing draft genome. Additionally, some larger Sanger scaffolds harbored marked  
483 discontinuities in allele frequencies, revealing putative misassemblies, as also reported in a previous study  
484 (Bryon *et al.* 2017a).

485

### 486 **Genome scaffolding with population genetic data**

487 The sliding window analyses revealed the limitations of the existing draft Sanger assembly for  
488 our study, and also suggested a way to overcome them. We reasoned that similarities in population allele  
489 frequencies within and between Sanger scaffolds could be used to resolve misassembled regions, as well  
490 as determine relative scaffold positions in the genome. For example, as apparent from the allele frequency  
491 data in Figure 4A, Sanger scaffold 5 cannot possibly be adjacent to Sanger scaffolds 17 or 24 in the *T.*  
492 *urticae* genome, but it could plausibly be adjacent to Sanger scaffolds such as 16 or 22.

493 To identify misassembled regions, we constructed a metric, AWD, to assess the continuity of  
494 allele frequencies in experimental populations between non-overlapping genomic windows (Figure 3, and  
495 Materials and Methods). AWD values are expected to be small between adjacent, non-overlapping  
496 windows in correctly assembled genomic regions, as in our experimental populations major allele  
497 frequency changes occurred at Mb scales (i.e., see Sanger scaffold 3 in Figure 4A). Consistent with this  
498 expectation, and after correcting for a small set of windows that gave locally anomalous allele frequencies  
499 (a potential effect of incorrect variant predictions or structural variation between strains, Figure S1),  
500 AWD values between adjacent windows were close to zero in most genomic intervals (the mean value  
501 within Sanger scaffolds was 0.025; Figure 4A, bottom). Exceptions occurred at the junctions between  
502 Sanger scaffolds, which were concatenated by decreasing length as shown in Figure 4A and, except by  
503 chance, are not expected to be physically adjacent. As calculated between concatenated Sanger scaffolds,  
504 the mean AWD value was 0.243, with a range between ~0.10 to 0.50; these values establish a *de facto*  
505 expectation for the magnitude of an AWD value anticipated at the site of a misassembly.

506 Applying a conservative AWD threshold for detecting assembly errors (Figure S1), clear  
507 misassemblies were apparent within Sanger scaffolds 1, 4 and 8 (Figure 4A, red asterisks). In each case,  
508 these corresponded to misassemblies previously noted by Bryon *et al.* (2017a) in an unrelated BSA  
509 mapping study in *T. urticae*. Further, Bryon *et al.* (2017a) reported a misassembly on scaffold 2 at the



510 location of a less dramatic but nonetheless elevated AWD value (orange asterisk in Figure 4A, and see  
511 Figure S1). For subsequent analyses, we treated these as candidate misassemblies, and broke the  
512 respective four Sanger scaffolds into subscaffolds (Table S2).

513 Linking together Sanger scaffolds with reciprocal minimal AWD values in terminal windows  
514 (Materials and Methods, and see Figure 3) generated three superscaffolds (hereafter referred to as “AWD-  
515 joined superscaffolds”). Each of the first 44 largest Sanger scaffolds was included in these superscaffolds  
516 except Sanger scaffolds 41 and 42, which were unplaced. Briefly, Sanger scaffold 41 was not  
517 polymorphic between SR-VP and Lon-Inb (Figure S2), and therefore could not be joined as the AWD  
518 method requires genetic differences. For Sanger scaffold 42, inspection of aligned Illumina reads revealed  
519 massive copy number variation (Figure S2), suggesting a complex misassembly; we therefore excluded it  
520 from subsequent analyses. Finally, of the Sanger scaffolds included in the AWD-joined superscaffolds,  
521 the orientations of those higher than 39 could not be determined (see Materials and Methods, Table S4).

522

### 523 **Sequence-based scaffolding of the Sanger assembly**

524 As a complementary approach to condense Sanger scaffolds into superscaffolds, we also  
525 leveraged short-read *de novo* assemblies for SR-VP, Lon-Inb, and five additional *T. urticae* strains. As  
526 expected, these Illumina short-read assemblies were more fragmented than the Sanger assembly (Table  
527 S1). Given the potential for errors in short-read assemblies of many thousands of contigs, we did not  
528 attempt to systematically use these assemblies to identify errors internal to Sanger scaffolds. In a more  
529 limited analysis, however, we identified instances where contigs “bridged” two Sanger scaffolds, and  
530 joined all but three Sanger scaffolds (8.1, 21, and 25) into superscaffolds (hereafter termed “assembly-  
531 bridged superscaffolds”; Table S3). As compared to the AWD-joined superscaffolds, more assembly-  
532 bridged superscaffolds were produced (eight as opposed to three). In the assembly-bridged superscaffolds,  
533 Sanger scaffold 41, which was unplaced in the AWD-joined superscaffolds, was bridged to Sanger  
534 scaffold 36.

535

### 536 **Consolidation of assemblies to three pseudochromosomes**

537 To produce a consolidated *T. urticae* pseudochromosome assembly, we resolved the AWD-joined  
538 and assembly-bridged superscaffolds (Figure 5). Where they could be compared, only a single  
539 discrepancy was observed. While in both sets of superscaffolds Sanger scaffolds 39 and 43 were together  
540 between the larger Sanger scaffolds 20 and 31 (Figure 5), the relative positions differed (Tables S3 and  
541 S4). The order from the assembly-bridged superscaffolds was selected for this pseudochromosome join,  
542 as well as for establishing the orientation of Sanger scaffolds 39 and higher (see Materials and Methods).  
543 Resolution of the two superscaffold assemblies resulted in three pseudochromosomes, pChr1-3, of lengths

544 32.7, 29.2 and 23.9 Mb, respectively (Figure 5). Further, short-read *de novo* assemblies were used to  
545 refine misassembly breakpoints in Sanger scaffolds 1, 2, 4, and 8 (Table S2).

546

### 547 **Validation of the pseudochromosome assembly**

548 We performed several analyses to assess the validity of the three pseudochromosomes. First, we  
549 examined allele frequencies for the 22 control, spirodiclofen-, and tomato-selected populations along  
550 pChr1-3 (Figure 4B). As compared to Figure 4A, striking discontinuities in AWD values were no longer  
551 apparent. In two cases AWD values barely exceeded  $\sim 0.1$ , and in one of these cases, at 3.46 Mb on pChr1  
552 (Figure 4B), the peak can be explained by a lack of genetic variation between SR-VP and Lon-Inb (a long  
553 shared haplotype between the strains in this region meant that the nearest adjacent windows available for  
554 AWD calculations were  $\sim 290$  kb apart; hence, an elevated AWD value is expected). Further, on average,  
555 AWD values between all pairs of the ends of pChr1-3 were large (Table S5), consistent with correct  
556 chromosome end assignments (note that the short-read *de novo* assemblies also supported the ends  
557 assigned to pChr1-3, Figure 5 and Table S3, as no respective scaffolds from any *T. urticae* strains bridged  
558 any combination of the ends of pChr1-3).

559 Finally, we assessed the pseudochromosome assembly using two smaller population allele  
560 frequency data sets reported previously. First, we reanalyzed the data of Bryon *et al.* (2017a). In a sliding  
561 window analysis using the parameters employed in Figure 4, we found, as expected, marked  
562 discontinuities in population allele frequency data between unassembled Sanger scaffolds (Figure S3A).  
563 We also verified the misassemblies noted by Bryon *et al.* (2017a) on Sanger scaffolds 1, 2, 4 and 8, which  
564 were also observed in the current study (Figure 4A). When the analysis was repeated using the  
565 pseudochromosomes (Figure S3B), all major discontinuities disappeared, and only a handful of minor  
566 ones were apparent (e.g., in the middle of pChr3, potentially reflecting structural differences among  
567 strains, but see Discussion). An analysis of data from another study (Van Leeuwen *et al.* 2012) gave a  
568 similar result (Figure S4). Therefore, the pseudochromosome assembly resolved discontinuities in allele  
569 frequencies across the genome – an expectation of a correct assembly – in experimental data from two  
570 prior studies.

571

### 572 **Genomic regions underlying responses to spirodiclofen**

573 With the three-pseudochromosome assembly, concerted increases in the frequency of SR-VP  
574 alleles were observed in spirodiclofen-treated as compared to control populations in several genomic  
575 regions (Figure 6A). To rule out an effect of genetic drift, we established a threshold for significant  
576 responses by permuting the data  $10^4$  times (see Materials and Methods). At a FDR of 5%, two peaks on  
577 pChr1 (hereafter spiro-QTL 1, at 6.56 Mb, and spiro-QTL 2, at 24.13 Mb) and one peak on pChr2 (spiro-

578 QTL 3 at 5.69 Mb) exceeded the significance threshold. In fact, the observed average allele frequency  
579 change of all eight pairwise contrasts (black line in Figure 6B) exceeded the maximum value from each of  
580 the  $10^4$  permutations at each of spiro-QTL 1-3. Using the G' approach as implemented in QTLseqr, these  
581 three peaks, and no others, were also identified as significant at a FDR of 5% (Figure S5).

582 To assess potential genes and variants responding to selection, we examined 150 kb genomic  
583 intervals centered on the QTL peak regions (Figure 6C-E). For spiro-QTL 1, no annotated detoxification  
584 genes were present; however, the peak was within 27.8 kb of *acetyl-CoA decarboxylase (ACCase;*  
585 *tetur21g02170)* (Figure 6C and Table S6), which encodes the target of spirodiclofen. As assessed with  
586 short-read alignments and *de novo* assemblies of Lon-Inb and SR-VP, for which contigs extended across  
587 the entire 7002 bp open reading frame of the large *ACCase* gene (contig numbers 849 and 1261 in the  
588 respective short-read assemblies), there were 37 single nucleotide differences. *ACCase* is highly  
589 conserved in eukaryotes, and consistent with purifying selection, 36 of these changes were synonymous.  
590 The single nonsynonymous change, an alanine to threonine change at position 1079 (A1079T), was  
591 unique to SR-VP compared to 16 other strains for which sequence data was available (see Materials and  
592 Methods).

593 In contrast, the peak region for spiro-QTL 2 was broader, forming a plateau of ~1 Mb in length  
594 (Figure 6B and Figure S6). The maximum change in allele frequencies at spiro-QTL 2 fell internal to a  
595 cluster of CYPs (Figure 6D). Four of these, *CYP392E4*, *CYP392E6*, *CYP392E7*, and *CYP392E8*, are  
596 intact in the Sanger reference sequence, one is an annotated pseudogene (*CYP392E5p*), and two  
597 additional annotations reflect apparent CYP fragments (*tetur27g00240* and *tetur27g00280*) (Table S7).  
598 Two other CYPs, *CYP392E9* and *CYP392E10*, which are present in a separate cluster, are located ~330  
599 kb distal to the peak region within the ~1 Mb interval (Figure S6). For both SR-VP and Lon-Inb, no short-  
600 read *de novo* contigs spanned the CYP cluster at the peak (Figure 6D), and as revealed by read coverage  
601 depth the region harbors substantial structural variation between SR-VP and Lon-Inb (Figure S7). For  
602 example, in Lon-Inb, most of the CYPs are present in approximately two to seven copies relative to the  
603 Sanger reference sequence. In contrast, in SR-VP read coverage for most of the CYPs revealed that they  
604 are present as single copies.

605 Finally, although no *CYPs* or genes in other known detoxification families are present near spiro-  
606 QTL 3 (Figure 6E and Table S8), *NADPH cytochrome P450 reductase (CPR, tetur18g03390)*, which is  
607 required for CYP activity, is located within ~25 kb of the sharp peak in allele frequency changes. As  
608 assessed with short-read alignments and *de novo* assemblies that spanned this locus (contig numbers 633  
609 and 459 for Lon-Inb and SR-VP, respectively), 10 nucleotide changes between Lon-Inb and SR-VP were  
610 present in the 2001 bp coding region of *CPR*. Only one change in SR-VP impacted the coding sequence,

611 an aspartic acid to tyrosine change at position 384 (D384Y). This variant was present in only one other  
612 strain, HexR.

613

#### 614 **Genomic regions associated with selection by tomato**

615 As opposed to the paired experimental design for selection studies with spirodiclofen, the five  
616 tomato-selected populations were unpaired to controls (Figure 1, and Materials and Methods). Therefore,  
617 we analyzed all possible groupings of the tomato-selected populations to five control populations. For  
618 each combination, we performed a QTL scan with the permutation approach as described for the  
619 spirodiclofen-selection analysis. In every combination, peaks that exceeded a 5% FDR for QTL detection  
620 were identified in a broad region near the middle of pChr3 (Table S9; changes in allele frequencies were  
621 always in the direction of the SR-VP parent). A representative result of one combination is shown in  
622 Figure 7. No other genomic regions were detected at the 5% FDR threshold in any combinations. The  
623 minimal region on pChr3 that responded to selection extended from ~7.48 to 17.02 Mb (Table S9). This  
624 region of 9.54 Mb comprises ~10% of the length of the genome. As assessed with the G' method (FDR of  
625 5%), this entire region was also strongly supported as a QTL interval (Figure S8). In addition, with the G'  
626 approach, six other QTL intervals were identified, albeit with modest G' values, of which the most notable  
627 was at ~2.5 Mb on pChr1. For all but one of these, allele frequency changes were in the direction of the  
628 SR-VP parent.

629

#### 630 **DISCUSSION**

631 In earlier work, we developed and applied BSA methods to *T. urticae* populations to identify loci  
632 responsible for several monogenic traits (Van Leeuwen *et al.* 2012; Demaeght *et al.* 2014; Bryon *et al.*  
633 2017a). In the current study, we extended these methods to reveal the quantitative basis of pesticide  
634 resistance and host plant adaptation by performing highly replicated, long-term experimental selections to  
635 spirodiclofen and tomato. As a first step, we resolved the draft Sanger assembly to three  
636 pseudochromosomes, a number matching the chromosome count reported from cytological studies (Helle  
637 and Bolland 1967). Notwithstanding new developments in long read sequencing technologies, assembling  
638 complete genomes of eukaryotes remains a challenge. The success of our population allele frequency  
639 approach to genome scaffolding results in part from the continuous nature of genome-wide allele  
640 frequency changes in populations. This contrasts with the more limited information that comes from  
641 individuals, e.g., from F2 mapping populations, where loci are either fixed for one of two alleles, or are  
642 heterozygous. Our genetic methods for curating and resolving draft assemblies should be applicable to  
643 other genome projects with species for which even a modest number of segregating populations can be  
644 generated.

645 Population allele frequency data from independent, future studies, potentially in combination with  
646 long read sequencing or optical mapping approaches (Shendure *et al.* 2017), will be important to identify  
647 and resolve any discrepancies in our refined *T. urticae* genome assembly. However, the pChr1-3  
648 assembly resolved ambiguities in two prior *T. urticae* BSA datasets, and is therefore sufficient to assess  
649 genome-wide responses to selection with no (or little) uncertainty arising from assembly errors. As  
650 revealed from genome-wide allele frequency data, selection in all experimental populations was apparent,  
651 with the complete fixation of parental SR-VP haplotypes at several chromosomal locations (shifts toward  
652 alleles from the Lon-Inb parent were also apparent, but less extreme). These instances of fixation likely  
653 reflected the purging of deleterious alleles contributed by one or the other inbred parent, although our data  
654 do not exclude phenomena such as segregation distortion. Although these fixation events likely precluded  
655 our ability to detect responses to selection by spirodiclofen and tomato in these regions, they comprised  
656 only a tiny fraction of the genome.

657 In response to selection by spirodiclofen, three genomic regions responded significantly. In two  
658 of the three cases (spiro-QTL 1 and 3), sharp peaks in BSA scans were observed. This pattern is  
659 reminiscent of the ultra-high resolution BSA genetic mapping of monogenic loci observed in earlier *T.*  
660 *urticae* studies, in which the peaks of response were either within or only a few tens of kb from causal  
661 genes (Van Leeuwen *et al.* 2012; Demaeght *et al.* 2014; Bryon *et al.* 2017a). For each spiro-QTL, striking  
662 candidate genes were located within or immediately adjacent to replicate-averaged BSA peaks; these are  
663 discussed as follows, with the caveat that we cannot rule out the involvement of other genes within the  
664 QTL intervals.

665 The peak for spiro-QTL 1 was located nearby *ACCase*, the putative molecular target of  
666 spirodiclofen, raising the possibility of target-site resistance. This result was unexpected as an earlier  
667 study that examined coding sequences and expression of *ACCase* in spirodiclofen resistant *T. urticae*  
668 strains found no evidence for target-site resistance (Van Pottelberge *et al.* 2009). As opposed to the sharp  
669 peak of response at *ACCase*, the response at spiro-QTL 2 was broader, encompassing a region of ~600  
670 kb. This genomic interval harbors two clusters of *CYPs* of the proliferated *T. urticae* CYP392 family  
671 (clan 2; genes *CYP392E4*, *-E6*, *-E7*, *-E8*, *-E9*, and *-E10*) (Grbić *et al.* 2011). Consistent with a role for  
672 *CYPs* in spirodiclofen resistance, treatment of the parental population from which SR-VP was derived  
673 with piperonyl butoxide (a *CYP* inhibitor) partially restored spirodiclofen sensitivity (Van Pottelberge *et*  
674 *al.* 2009). Further, *CYP392E7* and *CYP392E10* were also shown to be constitutively overexpressed and  
675 inducible by spirodiclofen in resistant *T. urticae* strains, and *CYP392E10* was shown to metabolize  
676 spirodiclofen by hydroxylation in a heterologous assay (Van Pottelberge *et al.* 2009; Demaeght *et al.*  
677 2013).

678 A prominent role for CYP-mediated detoxification of spiroadiclofen is further supported by the  
679 finding that *CPR* is located at spiro-QTL 3. Previous studies demonstrated that the single copy of *CPR* in  
680 *T. urticae* is functional as a redox partner for CYPs (Demaeght *et al.* 2013; Riga *et al.* 2015).  
681 Nevertheless, while variation in CYPs has been associated with xenobiotic resistance in many animals,  
682 including spider mites (Van Leeuwen and Dermauw 2016), the finding that *CPR* is located at spiro-QTL  
683 3 was not anticipated *a priori*. In particular, functional variation in *CPR* would be expected to affect  
684 multiple (or potentially all) CYPs, including those involved in primary metabolism and development.  
685 Therefore, allelic variants affecting *CPR* activity might be expected to be very deleterious. Some support  
686 for this conjecture comes from the control and tomato-adapted populations, which were not exposed to  
687 spiroadiclofen, and where the SR-VP haplotype of *CPR* went to near extinction. However, purifying  
688 selection acting at a linked locus (or loci) cannot be excluded.

689 Despite the identification of loci and candidate genes for spiroadiclofen resistance, the nature of  
690 underlying causal alleles, and how they interact to result in high-level resistance, remains unclear.  
691 Notwithstanding its widespread use, resistance to spiroadiclofen is still comparatively rare. In this context,  
692 it is noteworthy that in SR-VP a single nonsynonymous change was present in *ACCase* that was absent  
693 from all other *T. urticae* strains that we examined (A1079T). A similar finding was observed for the  
694 D384Y variant in *CPR*, although the change was present in one other strain, HexR. Whether HexR is  
695 resistant to spiroadiclofen is unknown, but CYP activity has been associated with resistance to many  
696 compounds, and HexR is a documented multi-pesticide resistant strain (Demaeght *et al.* 2014). How the  
697 amino acid changes in *ACCase* and *CPR* might impact resistance is not clear. For instance, the A1079T  
698 change in *ACCase* is outside the carboxyl-transferase domain that has been suggested to interact with  
699 keto-enol insecticides such as spiroadiclofen (Lümmen *et al.* 2014). Hence, if A1079T contributes to  
700 target-site insensitivity, it must presumably do so through an allosteric mechanism. Assessing if the SR-  
701 VP variants in *ACCase* and *CPR* impact resistance will require further study, as will establishing whether  
702 CYP392E7, CYP392E10, or other CYP392 family members in the spiro-QTL 2 region metabolize  
703 spiroadiclofen or its enol derivative *in vivo*. It should also be noted that substantial copy number variation  
704 for CYP392 family members was present between Lon-Inb and SR-VP (Figure S7), and short-read *de*  
705 *novo* assemblies for neither SR-VP nor Lon-Inb spanned the CYP cluster including *CYP392E4*, *-E6*, *-E7*,  
706 and *-E8*. Whether additional CYP genes are present in this region in Lon-Inb or SR-VP warrants further  
707 investigation. Regardless, our findings add to a growing body of evidence that copy number variation  
708 may play a prominent role in xenobiotic resistance in arthropods (Kwon *et al.* 2010; Zimmer *et al.* 2018;  
709 Weetman *et al.* 2018).

710 Finally, allele frequency shifts at each of the three spiro-QTL regions were comparatively modest  
711 (~25-35%). In only one case (spiro-QTL 2) did the SR-VP haplotype go to near fixation, although this

712 haplotype was at a comparatively high frequency in control populations as well. The mechanism by which  
713 moderate changes in allele frequencies at a small number of loci can confer comparatively high resistance  
714 levels will require further study. Despite the small size of spider mites (~0.6 mm), single crosses can be  
715 performed, and recent work succeeded in constructing near-isogenic *T. urticae* lines to functionally  
716 validate the contribution of several target-site mutations to resistance phenotypes (Bajda *et al.* 2017; Riga  
717 *et al.* 2017). Fine-mapping and near-isogenic line construction is therefore possible, and will be important  
718 as a tool for understanding components of genetic architecture, like dominance and epistasis, that while  
719 important for quantitative resistance, are not straightforward to test in population-level selection  
720 experiments with pooled individuals.

721         While a primary focus of our study was on resistance to spirodiclofen, SR-VP's performance on  
722 tomato relative to Lon-Inb was ~10-fold higher, which allowed us to test if genomic responses to  
723 selection by a pesticide and host plant are similar. Although far less than that observed for spirodiclofen  
724 resistance, the order of magnitude difference in tomato performance is comparatively large as assessed  
725 against prior studies of *T. urticae* strains on various host plants (Agrawal 2000; Wybouw *et al.* 2015).  
726 Even though our experimental design to assess selection by tomato was less powerful compared to that  
727 for spirodiclofen (paired samples were not used, and there were fewer replicates), as assessed by a PCA,  
728 tomato-selected populations were more strongly differentiated from control populations than were  
729 spirodiclofen-selected populations (i.e., genome-wide allele frequencies for spirodiclofen-selected  
730 populations more closely mirrored control populations than did tomato-selected ones, excluding the spiro-  
731 QTL 1-3 intervals). The genetic differentiation of tomato-selected samples, especially on pChr3, aided in  
732 genome reconstruction with the AWD method, and further a portion of pChr3 was significant for  
733 response to selection by tomato as assessed by permutations and the G' method. The latter method also  
734 suggested additional responses to selection on all three pseudochromosomes; however, these results  
735 should be approached with caution as these regions did not reach the threshold for detection as established  
736 by permutation, and the G' method was developed for and previously applied for QTL detection with  
737 simpler genetic designs (Magwene *et al.* 2011; Mansfeld and Grumet 2018).

738         Although additional work is required to validate the genetic basis of response to selection by  
739 tomato in the SR-VP × Lon-Inb cross, our findings suggest that it is likely highly polygenic. Further, the  
740 large candidate region for response to tomato on pChr3 was not detected as a significant QTL interval for  
741 selection by spirodiclofen, and the three QTL regions for response to spirodiclofen did not respond (or  
742 respond strongly) to selection by tomato. These findings suggest different genetic architectures. Our  
743 interpretation of a highly polygenic response to a host plant shift is consistent with several studies for host  
744 adaptation in plant-feeding insects (Jones 1998; Oppenheim *et al.* 2012). This may reflect the challenge

745 that herbivores face in overcoming the many defensive and nutritional barriers plants have evolved to  
746 deter them (Strong *et al.* 1984; Howe and Jander 2008).

747

## 748 **Concluding remarks**

749 Arthropod herbivores can adapt to novel host plants and pesticides. Deciphering the polygenic  
750 basis of these adaptation processes is important to maximize the effectiveness of modern integrated pest  
751 management strategies. We show that polygenic pesticide resistance and host plant use can be readily  
752 mapped in *T. urticae* using population-level selections, and that they can involve different genetic  
753 architectures. Further, genomic regions harboring small sets of candidate genes can be identified, an  
754 effect of recombination that accrues over multiple generations in populations of this herbivore. Although  
755 recent transcriptomic studies in arthropods have associated many gene families with xenobiotic resistance  
756 (Van Leeuwen and Dermauw 2016), our results with spiroticlofen nonetheless suggest a predominant  
757 role for genetic variation affecting a single major detoxification gene family (CYPs), potentially in  
758 combination with target-site resistance. In contrast, tomato adaptation was associated with the selection of  
759 a large genomic region, raising the possibility of more diverse underlying mechanisms. Studies with  
760 additional pesticide resistant and host-adapted strains will be important to extend our findings, as well as  
761 to establish their generality. Our work shows that such future studies are imminently possible in *T.*  
762 *urticae*, and in this context, our resolution of the genome assembly to pseudochromosomes should be  
763 invaluable.

764

## 765 **ACKNOWLEDGMENTS**

766 We thank Jon Seger and Fred Adler for helpful suggestions for detecting QTL with population  
767 allele frequency data, Ludek Tikovsky and Harold Lemereis for their assistance in plant rearing and  
768 maintenance of greenhouse rooms, Peter Demaeht for generation of the SR-VP inbred strain and René  
769 Feyereisen for helpful comments on the draft manuscript. This work was supported by the USA National  
770 Science Foundation (award 1457346 to R.M.C.) and the Research Foundation - Flanders (FWO, Belgium;  
771 grant G009312N to T.V.L. and grant G053815N to T.V.L. and W.D.). This project has received funding  
772 from the European Research Council (ERC) under the European Union's Horizon 2020 research and  
773 innovation programme (grant agreement No 772026). N.W. was supported by a Marie Skłodowska-Curie  
774 Action (MSCA) Individual Fellowship (658795-DOGMITE) and a Research Foundation - Flanders  
775 (FWO) fellowship (12T9818N) throughout this project. R.G. was funded by National Institutes of Health  
776 Genetics Training Grant T32GM007464. W.D. is a postdoctoral fellow of the Research Foundation -  
777 Flanders (FWO). Research reported in this publication utilized the High-Throughput Genomics and



778 Bioinformatic Analysis Shared Resource at Huntsman Cancer Institute at the University of Utah and was  
779 supported by the National Cancer Institute of the National Institutes of Health under Award Number  
780 P30CA042014. The content is solely the responsibility of the authors and does not necessarily represent  
781 the official views of the funding agencies.

782

783

784

## REFERENCES

785

786 Agrawal A. A., 2000 Host-range evolution: adaptation and trade-offs in fitness of mites on alternative  
787 hosts. *Ecology* 81: 500–508.

788 Agrawal A. A., F. Vala, and M. W. Sabelis, 2002 Induction of Preference and Performance after  
789 Acclimation to Novel Hosts in a Phytophagous Spider Mite: Adaptive Plasticity? *The American*  
790 *Naturalist* 159: 553–565. <https://doi.org/10.1086/339463>

791 Alexandre H., S. Ponsard, D. Bourguet, R. Vitalis, P. Audiot, *et al.*, 2013 When history repeats itself:  
792 exploring the genetic architecture of host-plant adaptation in two closely related lepidopteran  
793 species. *PLoS ONE* 8: e69211. <https://doi.org/10.1371/journal.pone.0069211>

794 Bajda S., W. Dermauw, R. Panteleri, N. Sugimoto, V. Douris, *et al.*, 2017 A mutation in the PSST  
795 homologue of complex I (NADH:ubiquinone oxidoreductase) from *Tetranychus urticae* is  
796 associated with resistance to METI acaricides. *Insect Biochemistry and Molecular Biology* 80:  
797 79–90. <https://doi.org/10.1016/j.ibmb.2016.11.010>

798 Bansal R., M. A. R. Mian, O. Mittapalli, and A. P. Michel, 2014 RNA-Seq reveals a xenobiotic stress  
799 response in the soybean aphid, *Aphis glycines*, when fed aphid-resistant soybean. *BMC genomics*  
800 15: 972.

801 Bass C., C. T. Zimmer, J. M. Riveron, C. S. Wilding, C. S. Wondji, *et al.*, 2013 Gene amplification and  
802 microsatellite polymorphism underlie a recent insect host shift. *Proceedings of the National*  
803 *Academy of Sciences* 110: 19460–19465. <https://doi.org/10.1073/pnas.1314122110>

804 Bretschneider T., R. Fisher, and R. Nauen, 2007 Inhibitors of lipid synthesis (acetyl-CoA-carboxylase  
805 inhibitors), pp. 909–925 in *Modern crop protection compounds*,.

806 Bryon A., A. H. Kurlovs, W. Dermauw, R. Greenhalgh, M. Riga, *et al.*, 2017a Disruption of a  
807 horizontally transferred phytoene desaturase abolishes carotenoid accumulation and diapause in

- 808 *Tetranychus urticae*. Proceedings of the National Academy of Sciences 114: E5871–E5880.  
809 <https://doi.org/10.1073/pnas.1706865114>
- 810 Bryon A., A. H. Kurlovs, T. Van Leeuwen, and R. M. Clark, 2017b A molecular-genetic understanding of  
811 diapause in spider mites: current knowledge and future directions: Molecular genetics of mite  
812 diapause. Physiological Entomology 42: 211–224. <https://doi.org/10.1111/phen.12201>
- 813 Ceccatti J. S., 2009 Insecticide resistance, economic entomology, and the evolutionary synthesis, 1914–  
814 1951. Trans. Am. Philos. Soc 1–21.
- 815 Chaisson M. J., and G. Tesler, 2012 Mapping single molecule sequencing reads using basic local  
816 alignment with successive refinement (BLASR): application and theory. BMC Bioinformatics 13:  
817 238. <https://doi.org/10.1186/1471-2105-13-238>
- 818 Cingolani P., A. Platts, L. L. Wang, M. Coon, T. Nguyen, *et al.*, 2012 A program for annotating and  
819 predicting the effects of single nucleotide polymorphisms, SnpEff: SNPs in the genome of  
820 *Drosophila melanogaster* strain w<sup>1118</sup>; iso-2; iso-3. Fly 6: 80–92.  
821 <https://doi.org/10.4161/fly.19695>
- 822 Coates B. S., and B. D. Siegfried, 2015 Linkage of an ABCC transporter to a single QTL that controls  
823 *Ostrinia nubilalis* larval resistance to the *Bacillus thuringiensis* Cry1Fa toxin. Insect  
824 Biochemistry and Molecular Biology 63: 86–96. <https://doi.org/10.1016/j.ibmb.2015.06.003>
- 825 Coates B. S., A. P. Alves, H. Wang, X. Zhou, T. Nowatzki, *et al.*, 2016 Quantitative trait locus mapping  
826 and functional genomics of an organophosphate resistance trait in the western corn rootworm,  
827 *Diabrotica virgifera virgifera*. Insect Mol Biol 25: 1–15. <https://doi.org/10.1111/imb.12194>
- 828 Demaeght P., W. Dermauw, D. Tsakireli, J. Khajehali, R. Nauen, *et al.*, 2013 Molecular analysis of  
829 resistance to acaricidal spirocyclic tetrone acids in *Tetranychus urticae*: CYP392E10 metabolizes  
830 spirodiclofen, but not its corresponding enol. Insect Biochemistry and Molecular Biology 43:  
831 544–554. <https://doi.org/10.1016/j.ibmb.2013.03.007>
- 832 Demaeght P., E. J. Osborne, J. Odman-Naresh, M. Grbić, R. Nauen, *et al.*, 2014 High resolution genetic  
833 mapping uncovers chitin synthase-1 as the target-site of the structurally diverse mite growth  
834 inhibitors clofentezine, hexythiazox and etoxazole in *Tetranychus urticae*. Insect Biochemistry  
835 and Molecular Biology 51: 52–61. <https://doi.org/10.1016/j.ibmb.2014.05.004>

- 836 Dermauw W., N. Wybouw, S. Rombauts, B. Menten, J. Vontas, *et al.*, 2013 A link between host plant  
837 adaptation and pesticide resistance in the polyphagous spider mite *Tetranychus urticae*.  
838 Proceedings of the National Academy of Sciences 110: E113–E122.  
839 <https://doi.org/10.1073/pnas.1213214110>
- 840 Dermauw W., A. Pym, C. Bass, T. Van Leeuwen, and R. Feyereisen, 2018 Does host plant adaptation  
841 lead to pesticide resistance in generalist herbivores? Current Opinion in Insect Science 26: 25–33.  
842 <https://doi.org/10.1016/j.cois.2018.01.001>
- 843 Díaz-Riquelme J., V. Zhurov, C. Rioja, I. Pérez-Moreno, R. Torres-Pérez, *et al.*, 2016 Comparative  
844 genome-wide transcriptome analysis of *Vitis vinifera* responses to adapted and non-adapted  
845 strains of two-spotted spider mite, *Tetranychus urticae*. BMC Genomics 17: 74.  
846 <https://doi.org/10.1186/s12864-016-2401-3>
- 847 Dobin A., C. A. Davis, F. Schlesinger, J. Drenkow, C. Zaleski, *et al.*, 2013 STAR: ultrafast universal  
848 RNA-seq aligner. Bioinformatics 29: 15–21. <https://doi.org/10.1093/bioinformatics/bts635>
- 849 Dobzhansky T., 1937 *Genetics and the Origin of Species*. Columbia University Press, New York.
- 850 Douris V., D. Steinbach, R. Panteleri, I. Livadaras, J. A. Pickett, *et al.*, 2016 Resistance mutation  
851 conserved between insects and mites unravels the benzoylurea insecticide mode of action on  
852 chitin biosynthesis. Proceedings of the National Academy of Sciences 113: 14692–14697.  
853 <https://doi.org/10.1073/pnas.1618258113>
- 854 Feyereisen R., W. Dermauw, and T. Van Leeuwen, 2015 Genotype to phenotype, the molecular and  
855 physiological dimensions of resistance in arthropods. Pestic Biochem Physiol 121: 61–77.  
856 <https://doi.org/10.1016/j.pestbp.2015.01.004>
- 857 ffrench-Constant R. H., P. J. Daborn, and G. Le Goff, 2004 The genetics and genomics of insecticide  
858 resistance. Trends Genet. 20: 163–170. <https://doi.org/10.1016/j.tig.2004.01.003>
- 859 Fry J. D., 1989 Evolutionary adaptation to host plants in a laboratory population of the phytophagous mite  
860 *Tetranychus urticae* Koch. Oecologia 81: 559–565.
- 861 Gahan L. J., 2001 Identification of a Gene Associated with Bt Resistance in *Heliothis virescens*. Science  
862 293: 857–860. <https://doi.org/10.1126/science.1060949>

- 863 Gould F., 1979 Rapid host range evolution in a population of the phytophagous mite *Tetranychus urticae*  
864 Koch. *Evolution* 33: 791. <https://doi.org/10.2307/2407646>
- 865 Grbić M., A. Khila, K.-Z. Lee, A. Bjelica, V. Grbić, *et al.*, 2007 Mity model: *Tetranychus urticae*, a  
866 candidate for chelicerate model organism. *BioEssays* 29: 489–496.  
867 <https://doi.org/10.1002/bies.20564>
- 868 Grbić M., T. Van Leeuwen, R. M. Clark, S. Rombauts, P. Rouzé, *et al.*, 2011 The genome of *Tetranychus*  
869 *urticae* reveals herbivorous pest adaptations. *Nature* 479: 487–492.  
870 <https://doi.org/10.1038/nature10640>
- 871 Gremme G., S. Steinbiss, and S. Kurtz, 2013 GenomeTools: A Comprehensive Software Library for  
872 Efficient Processing of Structured Genome Annotations. *IEEE/ACM Transactions on*  
873 *Computational Biology and Bioinformatics* 10: 645–656. <https://doi.org/10.1109/TCBB.2013.68>
- 874 Hardy N. B., D. A. Peterson, L. Ross, and J. A. Rosenheim, 2018 Does a plant-eating insect’s diet govern  
875 the evolution of insecticide resistance? Comparative tests of the pre-adaptation hypothesis.  
876 *Evolutionary Applications* 11: 739–747. <https://doi.org/10.1111/eva.12579>
- 877 Hawkins N. J., C. Bass, A. Dixon, and P. Neve, 2018 The evolutionary origins of pesticide resistance.  
878 *Biological Reviews of the Cambridge Philosophical Society*. <https://doi.org/10.1111/brv.12440>  
879 [Epub ahead of print]
- 880 Helle W., and H. R. Bolland, 1967 Karyotypes and sex-determination in spider mites (Tetranychidae).  
881 *Genetica* 38: 43–53.
- 882 Hemingway J., N. J. Hawkes, L. McCarroll, and H. Ranson, 2004 The molecular basis of insecticide  
883 resistance in mosquitoes. *Insect Biochemistry and Molecular Biology* 34: 653–665.  
884 <https://doi.org/10.1016/j.ibmb.2004.03.018>
- 885 Henniges-Janssen K., A. Reineke, D. G. Heckel, and A. T. Groot, 2011 Complex inheritance of larval  
886 adaptation in *Plutella xylostella* to a novel host plant. *Heredity (Edinb)* 107: 421–432.  
887 <https://doi.org/10.1038/hdy.2011.27>
- 888 Howe G. A., and G. Jander, 2008 Plant immunity to insect herbivores. *Annual Review of Plant Biology*  
889 59: 41–66. <https://doi.org/10.1146/annurev.arplant.59.032607.092825>

- 890 Jaquiéry J., S. Stoeckel, P. Nouhaud, L. Mieuzet, F. Mahéo, *et al.*, 2012 Genome scans reveal candidate  
891 regions involved in the adaptation to host plant in the pea aphid complex. *Mol. Ecol.* 21: 5251–  
892 5264. <https://doi.org/10.1111/mec.12048>
- 893 Jones C. D., 1998 The genetic basis of *Drosophila sechellia*'s resistance to a host plant toxin. *Genetics*  
894 149: 1899–1908.
- 895 Kwon D. H., J. M. Clark, and S. H. Lee, 2010 Extensive gene duplication of acetylcholinesterase  
896 associated with organophosphate resistance in the two-spotted spider mite. *Insect Molecular*  
897 *Biology* 19: 195–204. <https://doi.org/10.1111/j.1365-2583.2009.00958.x>
- 898 Li X., M. A. Schuler, and M. R. Berenbaum, 2007 Molecular Mechanisms of Metabolic Resistance to  
899 Synthetic and Natural Xenobiotics. *Annual Review of Entomology* 52: 231–253.  
900 <https://doi.org/10.1146/annurev.ento.51.110104.151104>
- 901 Li H., B. Handsaker, A. Wysoker, T. Fennell, J. Ruan, *et al.*, 2009 The Sequence Alignment/Map format  
902 and SAMtools. *Bioinformatics* 25: 2078–2079. <https://doi.org/10.1093/bioinformatics/btp352>
- 903 Li H., 2013 Aligning sequence reads, clone sequences and assembly contigs with BWA-MEM.  
904 [arXiv:1303.3997 \[q-bio\]](https://arxiv.org/abs/1303.3997).
- 905 Lümme P., J. Khajehali, K. Luther, and T. Van Leeuwen, 2014 The cyclic keto-enol insecticide  
906 spirotetramat inhibits insect and spider mite acetyl-CoA carboxylases by interfering with the  
907 carboxyltransferase partial reaction. *Insect Biochemistry and Molecular Biology* 55: 1–8.  
908 <https://doi.org/10.1016/j.ibmb.2014.09.010>
- 909 Magalhães S., J. Fayard, A. Janssen, D. Carbonell, and I. Olivieri, 2007 Adaptation in a spider mite  
910 population after long-term evolution on a single host plant. *J. Evol. Biol.* 20: 2016–2027.  
911 <https://doi.org/10.1111/j.1420-9101.2007.01365.x>
- 912 Magalhães S., E. Blanchet, M. Egas, and I. Olivieri, 2009 Are adaptation costs necessary to build up a  
913 local adaptation pattern? *BMC Evol. Biol.* 9: 182. <https://doi.org/10.1186/1471-2148-9-182>
- 914 Magwene P. M., J. H. Willis, and J. K. Kelly, 2011 The statistics of bulk segregant analysis using next  
915 generation sequencing. *PLoS Computational Biology* 7: e1002255.  
916 <https://doi.org/10.1371/journal.pcbi.1002255>

- 917 Mansfeld B. N., and R. Grumet, 2018 QTLseqr: An R package for bulk segregant analysis with next-  
918 generation sequencing. *The Plant Genome* 11: 0.  
919 <https://doi.org/10.3835/plantgenome2018.01.0006>
- 920 Midamegbe A., R. Vitalis, T. Malausa, E. Delava, S. Cros-Arteil, *et al.*, 2011 Scanning the European corn  
921 borer (*Ostrinia* spp.) genome for adaptive divergence between host-affiliated sibling species.  
922 *Mol. Ecol.* 20: 1414–1430. <https://doi.org/10.1111/j.1365-294X.2011.05035.x>
- 923 Migeon A., E. Nouguier, and F. Dorkeld, 2010 Spider Mites Web: A comprehensive database for the  
924 Tetranychidae, pp. 557–560 in *Trends in Acarology*,.
- 925 Nouhaud P., J. Peccoud, F. Mahéo, L. Mieuzet, J. Jaquiéry, *et al.*, 2014 Genomic regions repeatedly  
926 involved in divergence among plant-specialized pea aphid biotypes. *J. Evol. Biol.* 27: 2013–2020.  
927 <https://doi.org/10.1111/jeb.12441>
- 928 Oppenheim S. J., F. Gould, and K. R. Hopper, 2012 The genetic architecture of a complex ecological  
929 trait: host plant use in the specialist moth, *Heliothis subflexa*: the genetic architecture of host plant  
930 use. *Evolution* 66: 3336–3351. <https://doi.org/10.1111/j.1558-5646.2012.01712.x>
- 931 Oppenheim S. J., R. H. Baker, S. Simon, and R. DeSalle, 2015 We can't all be supermodels: the value of  
932 comparative transcriptomics to the study of non-model insects: Comparative transcriptomics of  
933 non-model insects. *Insect Molecular Biology* 24: 139–154. <https://doi.org/10.1111/imb.12154>
- 934 R Core Team, 2016 *R: A language and environment for statistical computing*. R Foundation for Statistical  
935 Computing, Vienna, Austria.
- 936 Ranson H., M. G. Paton, B. Jensen, L. McCarroll, A. Vaughan, *et al.*, 2004 Genetic mapping of genes  
937 conferring permethrin resistance in the malaria vector, *Anopheles gambiae*. *Insect Mol. Biol.* 13:  
938 379–386. <https://doi.org/10.1111/j.0962-1075.2004.00495.x>
- 939 Riga M., A. Myridakis, D. Tsakireli, E. Morou, E. G. Stephanou, *et al.*, 2015 Functional characterization  
940 of the *Tetranychus urticae* CYP392A11, a cytochrome P450 that hydroxylates the METI  
941 acaricides cyenopyrafen and fenpyroximate. *Insect Biochemistry and Molecular Biology* 65: 91–  
942 99. <https://doi.org/10.1016/j.ibmb.2015.09.004>
- 943 Riga M., S. Bajda, C. Themistokleous, S. Papadaki, M. Palzewicz, *et al.*, 2017 The relative contribution  
944 of target-site mutations in complex acaricide resistant phenotypes as assessed by marker assisted

- 945 backcrossing in *Tetranychus urticae*. Scientific Reports 7. [https://doi.org/10.1038/s41598-017-](https://doi.org/10.1038/s41598-017-09054-y)  
946 09054-y
- 947 Robinson J. T., H. Thorvaldsdóttir, W. Winckler, M. Guttman, E. S. Lander, *et al.*, 2011 Integrative  
948 genomics viewer. Nat. Biotechnol. 29: 24–26. <https://doi.org/10.1038/nbt.1754>
- 949 Roush R. T., and J. A. McKenzie, 1987 Ecological Genetics of Insecticide and Acaricide Resistance.  
950 Annual Review of Entomology 32: 361–380.  
951 <https://doi.org/10.1146/annurev.en.32.010187.002045>
- 952 Saavedra-Rodriguez K., C. Strode, A. F. Suarez, I. F. Salas, H. Ranson, *et al.*, 2008 Quantitative Trait  
953 Loci Mapping of Genome Regions Controlling Permethrin Resistance in the Mosquito *Aedes*  
954 *aegypti*. Genetics 180: 1137–1152. <https://doi.org/10.1534/genetics.108.087924>
- 955 Schoonhoven L. M., J. J. A. van Loon, and M. Dicke, 2005 *Insect-plant biology*. Oxford University Press,  
956 Oxford ; New York.
- 957 Shendure J., S. Balasubramanian, G. M. Church, W. Gilbert, J. Rogers, *et al.*, 2017 DNA sequencing at  
958 40: past, present and future. Nature 550: 345–353. <https://doi.org/10.1038/nature24286>
- 959 Snoeck S., N. Wybouw, T. Van Leeuwen, and W. Dermauw, 2018 Transcriptomic Plasticity in the  
960 Arthropod Generalist *Tetranychus urticae* Upon Long-Term Acclimation to Different Host  
961 Plants. G3&#58; Genes|Genomes|Genetics g3.200585.2018.  
962 <https://doi.org/10.1534/g3.118.200585>
- 963 Sparks T. C., and R. Nauen, 2015 IRAC: Mode of action classification and insecticide resistance  
964 management. Pestic Biochem Physiol 121: 122–128. <https://doi.org/10.1016/j.pestbp.2014.11.014>
- 965 Sterck L., K. Billiau, T. Abeel, P. Rouzé, and Y. Van de Peer, 2012 ORCAE: online resource for  
966 community annotation of eukaryotes. Nature Methods 9: 1041–1041.  
967 <https://doi.org/10.1038/nmeth.2242>
- 968 Strong D. R., J. H. Lawton, and T. R. E. Southwood, 1984 *Insects on plants: community patterns and*  
969 *mechanisms*. Blackwell, Oxford.
- 970 Thorvaldsdóttir H., J. T. Robinson, and J. P. Mesirov, 2013 Integrative Genomics Viewer (IGV): high-  
971 performance genomics data visualization and exploration. Bioinformatics 14: 178–192.  
972 <https://doi.org/10.1093/bib/bbs017>

- 973 Van der Auwera G. A., M. O. Carneiro, C. Hartl, R. Poplin, G. del Angel, *et al.*, 2013 From FastQ data to  
974 high-confidence variant calls: The Genome Analysis Toolkit best practices pipeline, pp. 11.10.1-  
975 11.10.33 in *Current Protocols in Bioinformatics*, edited by Bateman A., Pearson W. R., Stein L.  
976 D., Stormo G. D., Yates J. R. John Wiley & Sons, Inc., Hoboken, NJ, USA.
- 977 Van Leeuwen T., B. Vanholme, S. Van Pottelberge, P. Van Nieuwenhuysse, R. Nauen, *et al.*, 2008  
978 Mitochondrial heteroplasmy and the evolution of insecticide resistance: Non-Mendelian  
979 inheritance in action. *Proceedings of the National Academy of Sciences* 105: 5980–5985.  
980 <https://doi.org/10.1073/pnas.0802224105>
- 981 Van Leeuwen T., J. Vontas, A. Tsagkarakou, W. Dermauw, and L. Tirry, 2010 Acaricide resistance  
982 mechanisms in the two-spotted spider mite *Tetranychus urticae* and other important Acari: A  
983 review. *Insect Biochemistry and Molecular Biology* 40: 563–572.  
984 <https://doi.org/10.1016/j.ibmb.2010.05.008>
- 985 Van Leeuwen T., P. Demaeght, E. J. Osborne, W. Dermauw, S. Gohlke, *et al.*, 2012 Population bulk  
986 segregant mapping uncovers resistance mutations and the mode of action of a chitin synthesis  
987 inhibitor in arthropods. *Proceedings of the National Academy of Sciences* 109: 4407–4412.  
988 <https://doi.org/10.1073/pnas.1200068109>
- 989 Van Leeuwen T., and W. Dermauw, 2016 The molecular evolution of xenobiotic metabolism and  
990 resistance in chelicerate mites. *Annual Review of Entomology* 61: 475–498.  
991 <https://doi.org/10.1146/annurev-ento-010715-023907>
- 992 Van Pottelberge S., T. Van Leeuwen, J. Khajehali, and L. Tirry, 2009 Genetic and biochemical analysis  
993 of a laboratory-selected spiroadiclofen-resistant strain of *Tetranychus urticae* Koch (Acari:  
994 Tetranychidae). *Pest Management Science* 65: 358–366. <https://doi.org/10.1002/ps.1698>
- 995 Weetman D., L. S. Djogbenou, and E. Lucas, 2018 Copy number variation (CNV) and insecticide  
996 resistance in mosquitoes: evolving knowledge or an evolving problem? *Curr Opin Insect Sci* 27:  
997 82–88. <https://doi.org/10.1016/j.cois.2018.04.005>
- 998 Wickham H., 2016 *ggplot2: Elegant Graphics for Data Analysis*. Springer-Verlag New York, New York,  
999 NY.



- 1000 Wybouw N., W. Dermauw, L. Tirry, C. Stevens, M. Grbić, *et al.*, 2014 A gene horizontally transferred  
1001 from bacteria protects arthropods from host plant cyanide poisoning. *eLife* 3:e02365.  
1002 <https://doi.org/10.7554/eLife.02365>
- 1003 Wybouw N., V. Zhurov, C. Martel, K. A. Bruinsma, F. Hendrickx, *et al.*, 2015 Adaptation of a  
1004 polyphagous herbivore to a novel host plant extensively shapes the transcriptome of herbivore  
1005 and host. *Mol. Ecol.* 24: 4647–4663. <https://doi.org/10.1111/mec.13330>
- 1006 Wybouw N., T. Van Leeuwen, and W. Dermauw, 2018 A massive incorporation of microbial genes into  
1007 the genome of *Tetranychus urticae*, a polyphagous arthropod herbivore. *Insect Mol. Biol.* 27:  
1008 333–351. <https://doi.org/10.1111/imb.12374>
- 1009 Zhao J.-Y., X.-T. Zhao, J.-T. Sun, L.-F. Zou, S.-X. Yang, *et al.*, 2016 Transcriptome and proteome  
1010 analyses reveal complex mechanisms of reproductive diapause in the two-spotted spider mite,  
1011 *Tetranychus urticae*. *Insect Molecular Biology*. <https://doi.org/10.1111/imb.12286>
- 1012 Zimmer C. T., W. T. Garrood, K. S. Singh, E. Randall, B. Lueke, *et al.*, 2018 Neofunctionalization of  
1013 Duplicated P450 Genes Drives the Evolution of Insecticide Resistance in the Brown Planthopper.  
1014 *Current Biology* 28: 268-274.e5. <https://doi.org/10.1016/j.cub.2017.11.060>
- 1015

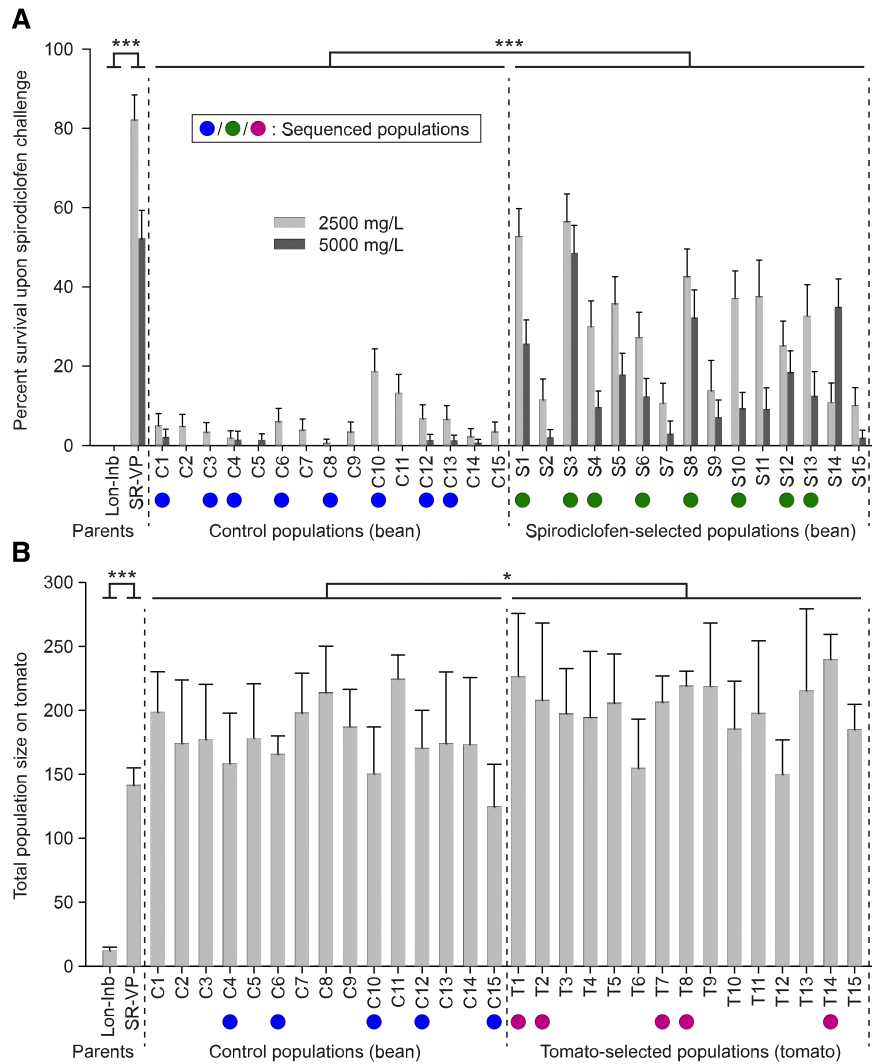

1016  
1017

1018 **Figure 1** Response to selection in parental strains and experimental populations. (A) Survival at the  
1019 deutonymphal stage after spraying with 2500 and 5000 mg/L of spiroticlofen (Envidor). Differences in  
1020 survival were present between the parental strains (Lon-Inb and SR-VP) and spiroticlofen-selected and  
1021 control populations as indicated. (B) Performance on tomato as assessed by total population size 10 days  
1022 after initial plant inoculation with 35 founding females. Significant differences between the parental  
1023 strains and tomato-selected and control populations are as indicated. Populations selected for genomic  
1024 sequencing are indicated by colored circles: blue, control populations; green, populations grown on bean,  
1025 selected with spiroticlofen; purple, populations maintained on tomato. In all plots, bars represent two  
1026 standard errors of the mean. Statistical significance:  $p < 0.05$ , \*,  $p < 0.0001$ , \*\*\*.

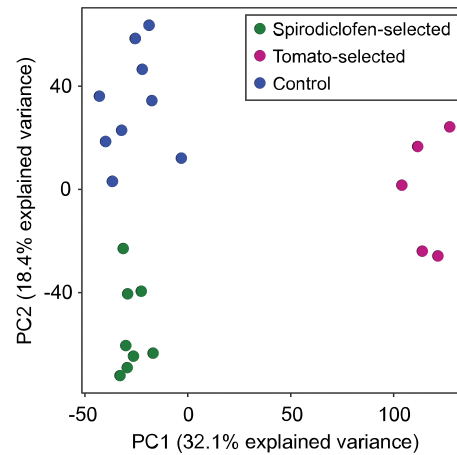

1027  
1028

1029 **Figure 2** Genomic responses to selection by spirodiclofen and tomato differ. Principal component  
1030 analysis of control, spirodiclofen-selected, and tomato-selected populations with genome-wide allele  
1031 frequency data at SNP loci. Circles represent individual populations colored by treatment as indicated  
1032 (legend, top right; compare to Figure 1).

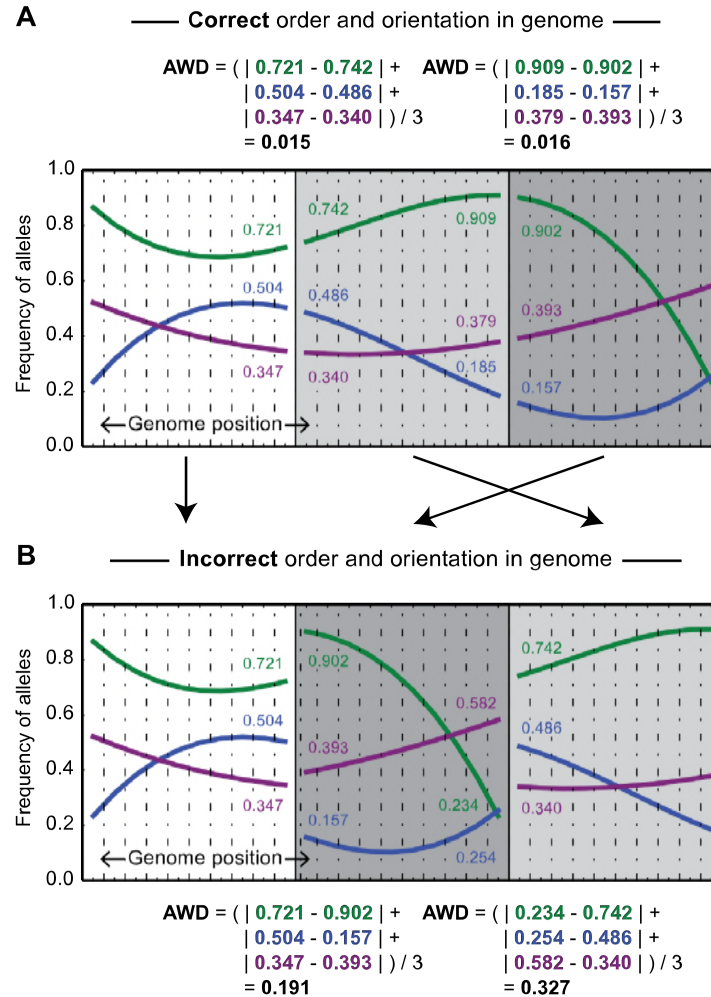

1033  
1034

1035 **Figure 3** Illustration of the average window distance (AWD) metric used for genome curation and  
 1036 assembly. (A) From experimental populations, allele frequencies, which can be estimated from short-read  
 1037 data (e.g., Figure 4 and Figures S1, S3 and S4), change proportionally to distance along chromosomes due  
 1038 to genetic drift or potentially selection. A schematic of a plausible pattern for three populations is shown  
 1039 (colored lines). At given sites in the genome (solid vertical lines with different intensity of shading on  
 1040 either side), the difference in allele frequencies in adjacent windows on either side of the solid lines will  
 1041 approach zero. At top, AWD calculations are shown for a genomic region in which the assembly is  
 1042 correct. (B) The same schematic as shown in panel A except that the two shaded genomic regions have  
 1043 been shuffled (that is, they are out of their true order). Now, when AWD values are calculated (bottom),  
 1044 the values are elevated markedly above zero. This illustrates how anomalously high AWD values detect  
 1045 misassemblies (Figure 4A); in a related approach, for unordered genomic regions (e.g., scaffolds in draft  
 1046 genomes), minimal AWD values between pairs of scaffolds suggest adjacency and orientation (Figure 4).

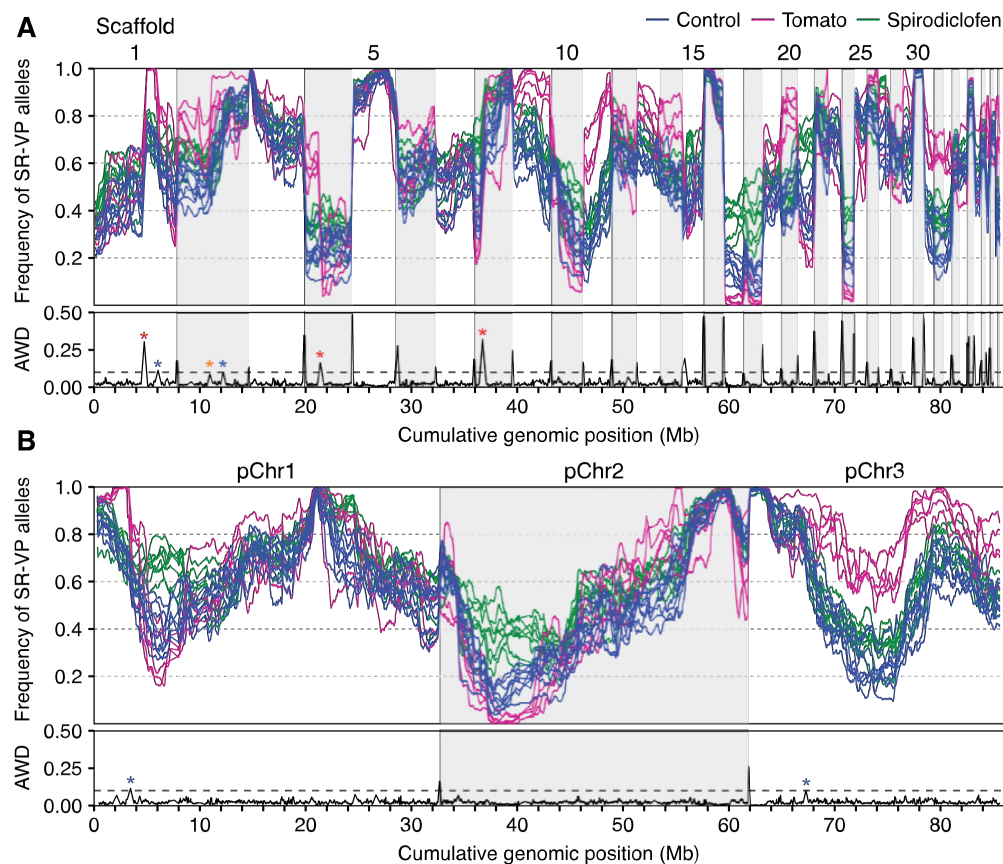

1047  
1048

1049 **Figure 4** A pseudochromosome assembly resolves discontinuities in allele frequencies in experimental  
1050 populations across the genome. (A and B) Frequency of SR-VP alleles in control (blue), spirodiclofen-  
1051 selected (green), and tomato-selected (magenta) populations as assessed in a sliding window analysis  
1052 (legend, top right). Allele frequencies are shown using the first 44 scaffolds of the Sanger assembly (A),  
1053 or the consolidated pseudochromosome assembly (B). Concatenated Sanger scaffolds or  
1054 pseudochromosomes are indicated by alternating white and gray shading, and are sorted by decreasing  
1055 length. At the bottom of each panel, the respective average window distances (AWD) are shown as  
1056 assessed with allele frequency data from all populations. In each panel, the dashed line represents an  
1057 AWD value of 0.1 (a value suggestive of misassemblies, see Results section). Three AWD peaks well  
1058 above the threshold correspond to obvious misassemblies (red asterisks on Sanger scaffolds 1, 4, and 8);  
1059 the AWD peak on Sanger scaffold 2 denoted with an orange asterisk was identified as a misassembly  
1060 previously (Bryon *et al.*, 2017a; see also Figure S3A). Two other peaks barely exceed the AWD value of  
1061 0.1 (on Sanger scaffolds 1 and 2, corresponding to pseudochromosomes 1 and 3 in the consolidated  
1062 assembly, respectively; blue asterisks, A and B); these peaks were not supported as misassemblies in  
1063 independent data sets (Figures S3 and S4), or in assemblies of *T. urticae* strains using short-read data.

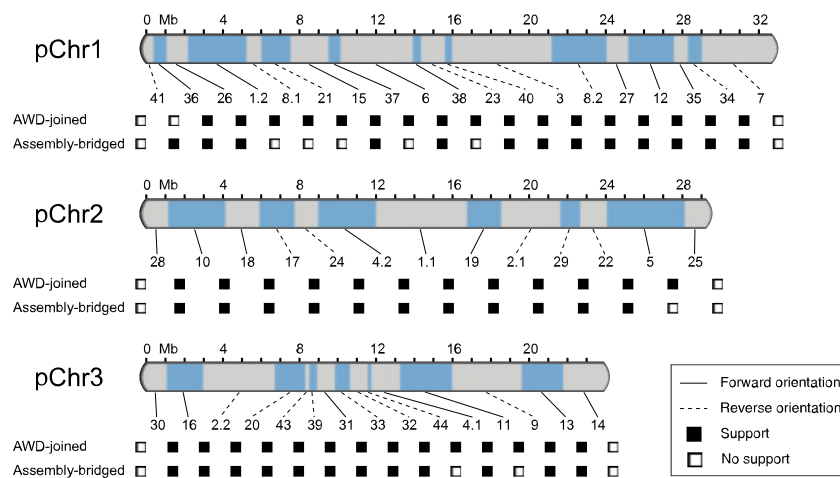

1064  
1065

1066 **Figure 5** Pseudochromosomes constructed from AWD-joined and assembly-bridged superscaffolds.  
1067 Composition of Sanger scaffolds in three pseudochromosomes (pChr1-3) with orientation indicated by  
1068 solid or dashed lines (see legend; Sanger scaffolds are indicated by alternating blue and gray shading).  
1069 The two sources of support for placing and orienting Sanger scaffolds – from the AWD-joining or  
1070 assembly-bridging methods – are as indicated beneath each pseudochromosome. Contig numbers for  
1071 respective *T. urticae* strains supporting assembly-bridging events are given in Table S3. For pChr3, AWD  
1072 support is indicated as positive (filled squares) for the placement of Sanger scaffolds 39 and 43 between  
1073 the larger Sanger scaffolds 20 and 31; however, the order and orientations of 39 and 43, as well as the  
1074 orientation of other small Sanger scaffolds, was refined with short-read *de novo* assemblies.

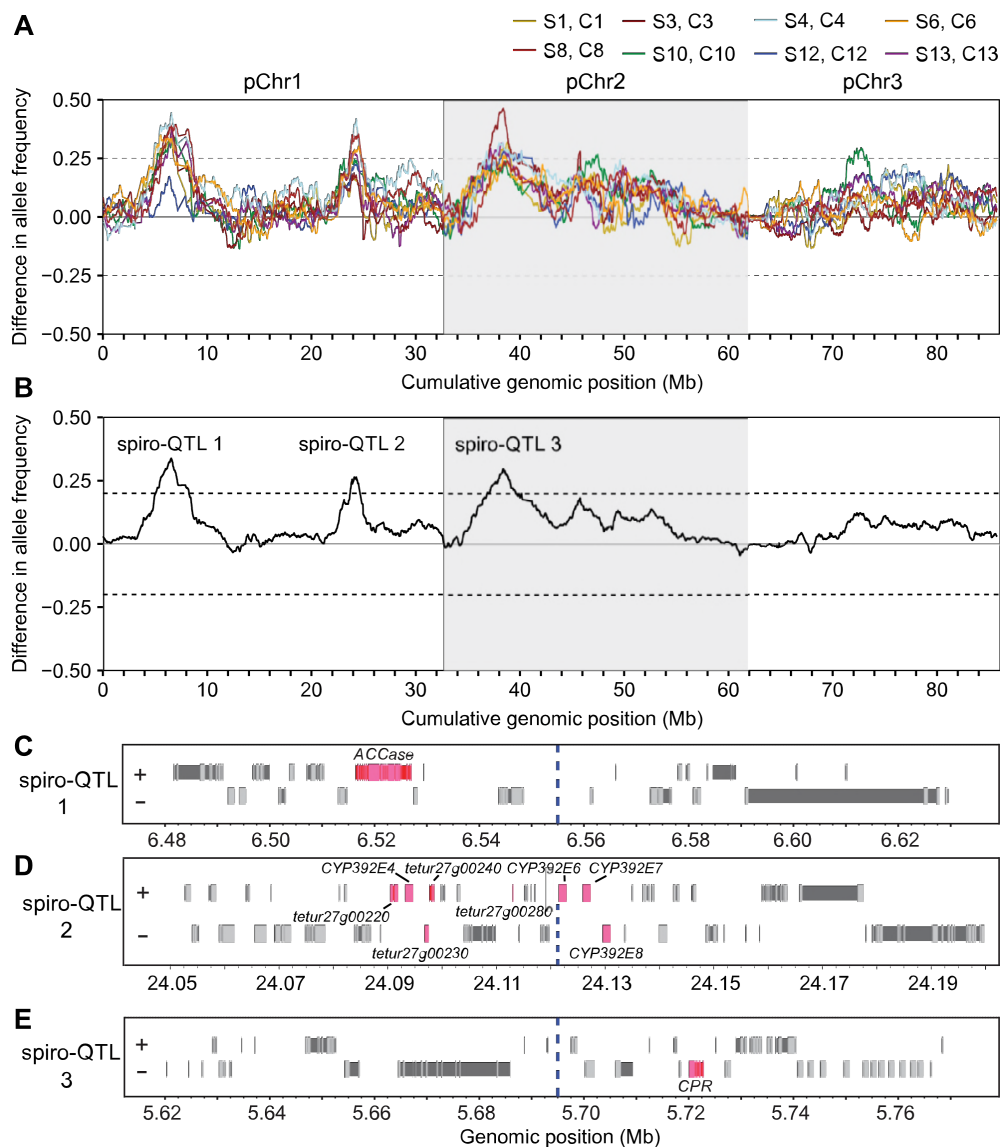

1075  
1076

1077 **Figure 6** Genomic responses to spirodiclofen selection in long-term populations. (A) Genome-wide  
1078 differences in SR-VP allele frequencies between pairs of eight spirodiclofen-selected populations and  
1079 their matching control populations (legend, top right) as assessed with sliding windows. (B) Mean change  
1080 in SR-VP allele frequency as assessed with all eight paired spirodiclofen/control replicates. Three QTL  
1081 (spiro-QTL 1-3) exceed the 5% FDR threshold for detection of responses to selection as assessed by a  
1082 permutation approach. (C-E) Gene models within the peak 150 kb windows for each of spiro-QTL 1-3.  
1083 Coding exons and introns are represented by light gray and darker boxes, respectively (+ and - denote  
1084 forward and reverse gene orientations). Candidate genes including *acetyl-CoA decarboxylase* (*ACCase*,  
1085 *tetur21g02170*) (C), *CYP* genes (pseudogenes or fragments have “tetur” IDs) (D), and *NADPH*  
1086 *cytochrome P450 reductase* (*CPR*, *tetur18g03390*) (E) are in pink. For panels C-E, coordinates are for the  
1087 respective pseudochromosomes (Figure 5), and the vertical dashed lines denote the respective peaks  
1088 shown in panel B.

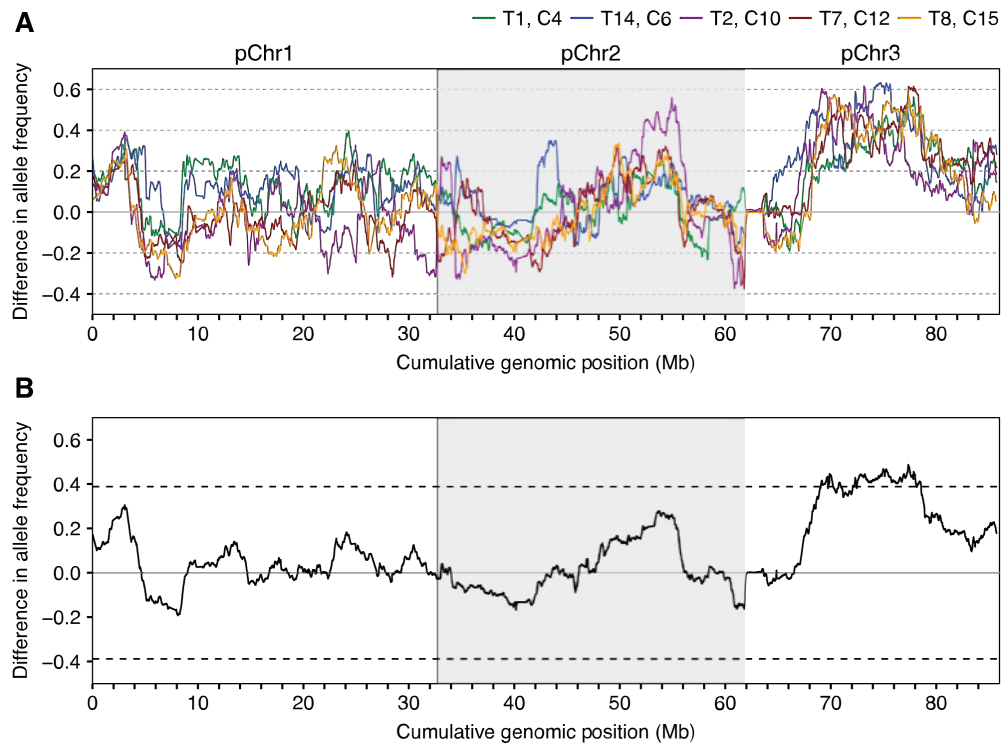

1089  
1090  
1091  
1092  
1093  
1094  
1095  
1096  
1097

**Figure 7** Genomic responses to selection on tomato plants in long-term populations. (A) Genome-wide differences in SR-VP allele frequencies between a representative pairing of five tomato-selected populations and five control populations (legend, top right) as assessed with sliding windows. (B) Mean change in SR-VP allele frequency as assessed with the five paired spirodiclofen/control replicates shown in panel A. Dashed lines denote a 5% FDR threshold for detection of responses to selection as assessed by a permutation approach.



1098 *Large data sets to be hosted at the US National Science Foundation funded CyVerse site (public*  
1099 *links are provided for access while the manuscript is under consideration; at acceptance, a DOI will be*  
1100 *provided for the collective data files, and will be provided in the “Data Availability” statement).*

1101  
1102

## 1103 FILES

1104

1105 **Tomato\_Spirodiclofen\_Joint.3.6-0-g89b7209.vcf.gz**, a VCF file with genotypic data for parental strains  
1106 and experimental populations. Link:

1107

1108 [https://de.cyverse.org/dl/d/11CC290E-A900-4DF9-A233-](https://de.cyverse.org/dl/d/11CC290E-A900-4DF9-A233-1F71F3D2C693/Tomato_Spirodiclofen_Joint.3.6-0-g89b7209.vcf.gz)  
1109 [1F71F3D2C693/Tomato\\_Spirodiclofen\\_Joint.3.6-0-g89b7209.vcf.gz](https://de.cyverse.org/dl/d/11CC290E-A900-4DF9-A233-1F71F3D2C693/Tomato_Spirodiclofen_Joint.3.6-0-g89b7209.vcf.gz)

1110

1111 **Heber.bam**, a BLASR alignment of short-read assembled scaffolds from strain Heber to the *T. urticae*  
1112 Sanger reference assembly. Link:

1113

1114 <https://de.cyverse.org/dl/d/06735A0C-0B53-4C84-BBC8-B25AE38A617B/Heber.bam>

1115

1116 **Heber.fasta.gz**, the input file used to generate file Heber.bam. Link:

1117

1118 <https://de.cyverse.org/dl/d/5AFA43A1-3E0A-4A00-818F-E024F1BEE619/Heber.fasta.gz>

1119

1120 **Lon-Inb.bam**, a BLASR alignment of short-read assembled scaffolds from strain Lon-Inb to the *T.*  
1121 *urticae* Sanger reference assembly. Link:

1122

1123 <https://de.cyverse.org/dl/d/E5A81F52-2CCF-4490-B462-FA032FDF7910/Lon-Inb.bam>

1124

1125 **Lon-Inb.fasta.gz**, the input file used to generate file Lon-Inb.bam. Link:

1126

1127 <https://de.cyverse.org/dl/d/369C3498-911F-47A0-8A27-C3D4477CF79E/Lon-Inb.fasta.gz>

1128

1129 **Parrott.bam**, a BLASR alignment of short-read assembled scaffolds from strain Parrott to the *T. urticae*  
1130 Sanger reference assembly. Link:

1131

1132 <https://de.cyverse.org/dl/d/1FB6B2DB-CCFE-46C1-A9C7-B61E4DEB5CEF/Parrott.bam>

1133

1134 **Parrott.fasta.gz**, the input file used to generate file Parrott.bam. Link:

1135

1136 <https://de.cyverse.org/dl/d/6FA958FB-54E3-4F5B-9328-83DBE97F309C/Parrott.fasta.gz>

1137

1138 **RS.bam**, a BLASR alignment of short-read assembled scaffolds from strain RS to the *T. urticae* Sanger  
1139 reference assembly. Link:

1140

1141 <https://de.cyverse.org/dl/d/07C5AA0E-9684-4F44-A9D0-5699E5373950/RS.bam>

1142

1143 **RS.fasta.gz**, the input file used to generate file RS.bam. Link:

1144

1145 <https://de.cyverse.org/dl/d/363ADA78-BB75-478B-AEC4-A5C86EB0903D/RS.fasta.gz>

1146

1147 **SR-VP.bam**, a BLASR alignment of short-read assembled scaffolds from strain SR-VP to the *T. urticae*  
1148 Sanger reference assembly. Link:

1149  
1150 <https://de.cyverse.org/dl/d/9506FBDE-5874-4822-8715-CBBA420F89DB/SR-VP.bam>  
1151  
1152 **SR-VP.fasta.gz**, the input file used to generate file SR-VP.bam. Link:  
1153  
1154 <https://de.cyverse.org/dl/d/78140292-BC67-459C-B5A9-FCCC84FC1E43/SR-VP.fasta.gz>  
1155  
1156 **ShCo.bam**, a BLASR alignment of short-read assembled scaffolds from strain ShCo to the *T. urticae*  
1157 Sanger reference assembly. Link:  
1158  
1159 <https://de.cyverse.org/dl/d/71BB8C0E-12B5-4EDE-8F7C-D0933A11D3EF/ShCo.bam>  
1160  
1161 **ShCo.fasta.gz**, the input file used to generate file ShCo.bam. Link:  
1162  
1163 <https://de.cyverse.org/dl/d/116D52AC-1463-489C-A2EE-BD4FBBB800F6/ShCo.fasta.gz>  
1164  
1165 **WG-Del.bam**, a BLASR alignment of short-read assembled scaffolds from strain WG-Del to the *T.*  
1166 *urticae* Sanger reference assembly. Link:  
1167  
1168 <https://de.cyverse.org/dl/d/4F50B8C5-8440-43EC-9FCE-7A2DBBE5DD1F/WG-Del.bam>  
1169  
1170 **WG-Del.fasta.gz**, the input file used to generate file WG-Del.bam. Link:  
1171  
1172 <https://de.cyverse.org/dl/d/A546E0BC-B0B6-48C5-BFB0-7D48954A4ACF/WG-Del.fasta.gz>  
1173  
1174 **Pseudochromosome.fasta.gz**, the *T. urticae* pseudochromosome 1-3 sequences.  
1175  
1176 [https://de.cyverse.org/dl/d/0FAB6310-135C-4F33-96F3-](https://de.cyverse.org/dl/d/0FAB6310-135C-4F33-96F3-FEE77D5A3F06/Tetranychus_urticae.Pseudochromosome.fasta.gz)  
1177 [FEE77D5A3F06/Tetranychus\\_urticae.Pseudochromosome.fasta.gz](https://de.cyverse.org/dl/d/0FAB6310-135C-4F33-96F3-FEE77D5A3F06/Tetranychus_urticae.Pseudochromosome.fasta.gz)  
1178
